1 **Single-nucleus transcriptomics reveals functional compartmentalization in syncytial**  
2 **skeletal muscle cells**

3 Minchul Kim<sup>1,4</sup>, Vedran Franke<sup>2,4</sup>, Bettina Brandt<sup>1</sup>, Elijah D. Lowenstein<sup>1</sup>, Verena Schöwel<sup>3</sup>,  
4 Simone Spuler<sup>3</sup>, Altuna Akalin<sup>2,\*</sup> and Carmen Birchmeier<sup>1,\*</sup>

5

6 <sup>1</sup>Developmental Biology/Signal Transduction, Max Delbrueck Center for Molecular Medicine,  
7 Berlin, Germany

8 <sup>2</sup>Bioinformatics, Berlin Institute for Medical Science Biology, Max Delbrueck Center for  
9 Molecular Medicine, Berlin, Germany

10 <sup>3</sup>Muscle Research Unit, Experimental and Clinical Research Center, Charité Medical Faculty  
11 and Max Delbrueck Center for Molecular Medicine, Berlin, Germany

12 <sup>4</sup>These authors contributed equally to this work

13 \* Co-corresponding authors: [cbirch@mdc-berlin.de](mailto:cbirch@mdc-berlin.de); [altuna.akalin@mdc-berlin.de](mailto:altuna.akalin@mdc-berlin.de)

14

15

16

17

18

19

20 **Abstract**

21 Syncytial skeletal muscle cells contain hundreds of nuclei in a shared cytoplasm. We investigated  
22 nuclear heterogeneity and transcriptional dynamics in the uninjured and regenerating muscle using  
23 single-nucleus RNA-sequencing (snRNAseq) of isolated nuclei from muscle fibers. This revealed  
24 distinct nuclear subtypes unrelated to fiber type diversity, completely novel subtypes as well as  
25 the expected ones at the neuromuscular and myotendinous junctions. In fibers of the *Mdx*  
26 dystrophy mouse model, new subtypes emerged, among them nuclei expressing a repair signature  
27 that were also abundant in the muscle of dystrophy patients, and a nuclear population associated  
28 with necrotic fibers. Finally, modifications of our approach revealed the compartmentalization in  
29 the rare and specialized muscle spindle. Our data identifies new nuclear compartments of the  
30 myofiber and defines a molecular roadmap for their functional analyses; the data can be freely  
31 explored on the MyoExplorer server (<https://shiny.mdc-berlin.net/MyoExplorer/>).

32

33

34

35

36

37

38

39

## 40 **Introduction**

41 All cells need to organize their intracellular space to properly function. In doing so, cells employ  
42 various strategies like phase separation, polarized trafficking, and compartmentalization of  
43 metabolites<sup>1-4</sup>. Syncytial cells face an additional challenge to this fundamental problem because  
44 individual nuclei in the syncytium can potentially have distinct functions and express different sets  
45 of genes. An outstanding example of this is the skeletal muscle fiber, a syncytium containing  
46 hundreds of nuclei in very large cytoplasm that possesses functionally distinct compartments. The  
47 best documented compartment is located below the neuromuscular junction (NMJ), the synapse  
48 formed between motor neurons and muscle fibers. NMJ form in a narrow central region of the  
49 fiber, and are characterized by the enrichment of proteins that function in the transmission of the  
50 signal provided by motor neurons to elicit muscle contraction<sup>5-9</sup>. Motor neurons are known to  
51 instruct myonuclei at the synapse to express genes that function in synaptic transmission. Another  
52 specialized compartment is located at the end of the myofibers where they attach to the tendon,  
53 allowing force transmission. Many cell adhesion and cytoskeletal proteins are known to be  
54 enriched at the MTJ<sup>10,11</sup>. However, little is known about the transcriptional characteristics of MTJ  
55 myonuclei and to date only a few genes like *Col22a1*, *Ankrd1* and *LoxL3* were reported to be  
56 specifically expressed at the mammalian MTJ<sup>12-14</sup>. Previous studies have reported that the diffusion  
57 of transcripts and proteins in myofibers is limited, and indeed specific transcripts and proteins  
58 associated with the NMJ and MTJ appear to diffuse little inside the fiber<sup>5,11,15,16</sup>. Therefore, locally  
59 regulated transcription plays an important role in establishing functional compartments in the  
60 muscle. In addition, stochastic transcription of particular genes has been reported in myofibers,  
61 but it is unknown whether this reflects differences in myonuclear identities<sup>17</sup>. Since a systematic  
62 analysis is currently lacking, we neither know the extent of myonuclear heterogeneity nor can we

63 assess whether additional myonuclear types exist beyond those at the NMJ and MTJ. Such  
64 knowledge may provide insight into how skeletal muscle cells orchestrate their many functions.  
65 Previous studies on gene expression in the muscle relied on the analysis of selected candidates by  
66 *in situ* hybridization or on profiling the entire muscle tissue. The former is difficult to scale up,  
67 whereas the latter averages the transcriptomes of all nuclei. More recently, several studies have  
68 used single-cell approaches to reveal the cellular composition of the entire muscle tissue<sup>18-20</sup>.  
69 However, these approaches did not sample the syncytial myofibers. Single-nucleus RNA-Seq  
70 (snRNAseq) using cultured human myotubes failed to detect transcriptional heterogeneity among  
71 nuclei<sup>21</sup>, underscoring the importance of studying the heterogeneity in an *in vivo* context where  
72 myofibers interact with surrounding cell types.

73

## 74 **Results**

### 75 **Single-nucleus RNA-Seq analysis of uninjured and regenerating muscles**

76 We genetically labeled mouse myonuclei by crossing a myofiber-specific Cre driver (*HSA-Cre*)  
77 with a Cre-dependent H2B-GFP reporter. H2B-GFP is deposited at the chromatin, which allows  
78 us to isolate single myonuclei using flow cytometry. Nuclei of regenerating fibers were also  
79 efficiently labeled 7 days after cardiotoxin-induced injury (7 days post injury; 7 d.p.i.)  
80 (Supplementary Fig. 1a; note that nuclei in uninjured and regenerating fiber locate peripherally  
81 and centrally, respectively<sup>22</sup>). We confirmed the efficiency and specificity of the H2B-GFP  
82 labeling (Supplementary Fig. 1a-1c). H2B-GFP was absent in endothelia (Cd31+), Schwann cells  
83 (Egr2+), tissue resident macrophages (F4/80+) and muscle stem cells (Pax7+) (Supplementary

84 Fig. 1c); nuclei of these diverse cell types lie outside the fiber and together make up around 50%  
85 of all nuclei in the tissue.

86 We next established a protocol for the rapid isolation of myonuclei. Conventional methods involve  
87 enzymatic dissociation of muscle fibers at 37°C, which can cause secondary changes in gene  
88 expression<sup>23-25</sup>. We used a procedure that took 20 minutes from dissection to flow cytometry,  
89 employing fast mechanical disruption on ice. Indeed, our subsequent analysis indicated that this  
90 protocol avoided the expression of stress-induced genes (see Methods).

91 For snRNAseq profiling, we used the CEL-Seq2 technology<sup>26</sup>, a low throughput plate-based  
92 method with high gene detection sensitivity<sup>27</sup>. Considering only exonic reads and genes detected  
93 in at least 5 nuclei, we detected 1000-2000 genes per nucleus (Supplementary Fig. 2a-2b). Median  
94 mitochondrial read thresholds were 1.3% or less in all samples used in this study (Supplementary  
95 Fig. 2c). We analyzed nuclei from uninjured (1,591 nuclei) and regenerating *tibialis anterior* (TA)  
96 muscle (7 and 14 d.p.i., 946 and 1,661 nuclei, respectively). Uniform Manifold Approximation  
97 and Projection (UMAP) analysis of these datasets revealed heterogeneity among myonuclei (Fig.  
98 1a). All nuclei expressed high levels of *Ttn*, a pan-muscle marker (Fig. 1b). The TA muscle  
99 contains three different fiber types (IIA - intermediate, IIB - very fast and IIX - fast) that express  
100 distinct myosin genes. The largest cluster, bulk myonuclei, could be sub-divided into nuclei from  
101 distinct fiber types (Fig. 1b); *Myh1*- (IIX; lower left part of the cluster) or *Myh4* (IIB; upper right  
102 part of the cluster)-positive nuclei were most abundant and present roughly in a ratio of 1:1. *Myh2*  
103 (IIA)-expressing nuclei represented a minor population, consistent with the reported proportion of  
104 fiber types<sup>28</sup>. Notably, *Myh2* expressing nuclei mainly located to the *Myh1*-positive side in the  
105 UMAP plot, but not to the *Myh4*-positive side (Fig. 1b). By fluorescence in situ hybridization

106 (FISH), we could readily observe Myh1/Myh2 co-expressing fibers, but not Myh2/Myh4 fibers  
107 (Supplementary Fig. 3).

108 Next, we defined genes that showed a dynamic expression profile during regeneration  
109 (Supplementary Fig. 4a and Supplementary Table 1). For instance, genes like *Arrdc2*, *SmoX*, *Gpt2*  
110 and *Pdk4* were strongly expressed in uninjured muscle but not during regeneration, whereas genes  
111 like *Mettl21c*, *Cish* and *Slc26a2* were specifically expressed at 7 d.p.i. These results were validated  
112 by RT-qPCR using isolated GFP+ myonuclei and FISH (Supplementary Fig. 4b-4c).

113 In addition to the bulk myonuclear population, we detected smaller populations with very distinct  
114 transcriptomes that expressed pan-muscle genes like *Ttn* (Fig. 1a-1c). Like the bulk nuclei, distinct  
115 nuclei in these populations expressed different myosin genes, indicating that the heterogeneity is  
116 not driven by fiber type differences (Fig. 1b). We first searched for and identified a cluster  
117 specifically expressing known NMJ marker genes such as *Chrna1*, *Prkar1a*, *Ache* and *Chrne* that  
118 was present in uninjured and regenerating muscle<sup>5</sup> (Fig. 1d and Supplementary Table 4). Our data  
119 identified many other genes not previously known to be specifically expressed at the NMJ such as  
120 *Vav3*, *Ablim2*, *Phldb2* and *Ufsp1* (Fig. 1d). FISH of newly identified markers and the known  
121 marker *Prkar1a* confirmed their specific expression at the NMJ (Fig. 1e). The full list of marker  
122 genes identified in this study is available in Supplementary Table 2.

123

## 124 **Two distinct nuclear populations at the myotendinous junction**

125 We found two clearly distinct nuclear populations that expressed MTJ-related genes in uninjured  
126 and regenerating muscle, and designated them MTJ-A and MTJ-B (Fig. 2a and Supplementary  
127 Table 4). MTJ-A nuclei expressed genes whose protein products are known to be enriched at the

128 MTJ (e.g. *Itgb1*)<sup>29</sup> as well as specific collagens (e.g. *Col24a1* and *Col22a1*). *Col22a1* has been  
129 functionally characterized in zebrafish using morpholino knockdowns that disrupt MTJ  
130 formation<sup>30</sup>. MTJ-B nuclei expressed an alternative set of collagens that are known to be deposited  
131 at the MTJ such as *Colla2*, *Col6a1* and *Col6a3*<sup>31</sup>. *Col6a1* expression was particularly notable  
132 because its mutation causes Bethlem myopathy, which is characterized by deficits at the MTJ<sup>32</sup>.

133 We validated the two top marker genes of MTJ-A (*Tigd4* and *Col22a1*) using FISH and observed  
134 their expression in nuclei at fiber endings (Fig. 2b and Supplementary Fig. 5). These transcripts  
135 were exclusively expressed from H2B-GFP positive myonuclei and present only at the MTJ. Their  
136 expression became much more pronounced at 14 d.p.i. compared to uninjured muscle (Fig. 2b).  
137 To visualize heterogeneity within the syncytium, we isolated single fibers and performed double  
138 FISH (Fig. 2c). *Tigd4* FISH signals were detected at fiber ends where the MTJ is located, whereas  
139 *Ufsp1* transcripts appeared at the middle of the fiber where the NMJ is located.

140 We detected transcripts of MTJ-B genes (*Pdgfrb*, *Col6a3*) expressed from H2B-GFP nuclei at the  
141 MTJ in both uninjured muscle and at 14 d.p.i. (Supplementary Fig. 6). We also confirmed that  
142 Ebf1 protein is present in H2B-GFP positive myonuclei close to the MTJ (Fig. 2b). *Pdgfrb* and  
143 *Col6a3* are known to be expressed by the connective tissue, and indeed these transcripts were also  
144 detected in cells located distally to the MTJ and outside the fiber (Supplementary Fig. 6). However,  
145 such cells were neither marked by H2B-GFP nor by *Tm*. Thus, MTJ-B nuclei co-expressing muscle  
146 genes and *Pdgfrb*, *Col6a3* or Ebf1 were exclusively located at end of the muscle fibers. Unlike  
147 MTJ-A nuclei, those expressing the MTJ-B signature were not found in every fiber. Because the  
148 MTJ-B signature includes both markers of muscle fibers and of connective tissue cells, we  
149 compared the gene signatures of MTJ-B nuclei to the ones of known cell types in the muscle tissue,

150 specifically with the connective tissue cell types identified in a previous single-cell sequencing  
151 experiment that excluded syncytial myofibers<sup>18</sup>. None of these cell types expressed the MTJ-B  
152 signature. Thus, MTJ-B represents a novel nuclear population in the myofiber that co-expresses  
153 genes typical of the myofiber (e.g. *Ttn*) and of connective tissue (*Pdgfrb*, *Col6a3*, *Ebf1*).

154

### 155 **Identification of additional novel myonuclear populations**

156 Further novel myonuclear compartments were identified by our systematic analysis, and we show  
157 exemplary genes preferentially expressed by each population in Figure 3a. The first of these we  
158 named after the top marker, *Rian*, a maternally imprinted lncRNA. This cluster also expressed  
159 other lncRNAs that are all located at the same genomic locus (also known as *Dlk1-Dio3* locus)  
160 like *Mirg* and *Meg3* (Fig. 3a-3b and Supplementary Table 2). The *Dlk1-Dio3* locus additionally  
161 encodes a large number of microRNAs expressed from the maternal allele, among them  
162 microRNAs known to target transcripts of mitochondrial proteins encoded by the nucleus<sup>33</sup>. FISH  
163 against *Rian* transcripts showed clear and strong expression in a subset of myonuclei (Fig. 3c),  
164 which was observed regardless of the animal's sex (data not shown). FISH on isolated fibers  
165 showed dispersed localization of *Rian* expressing nuclei without clear positional preference (Fig.  
166 3d). A previous study reported that the *Dlk1-Dio3* locus becomes inactive during myogenic  
167 differentiation<sup>34</sup>. However, our results show that some myonuclei retain expression, which might  
168 be important for the metabolic shaping of the fiber.

169 The top marker of the second cluster was *Gssos2*, an antisense lncRNA, and these nuclei expressed  
170 many genes that function in endoplasmic reticulum (ER)-associated protein translation and  
171 trafficking (Fig. 3a-3b). Among these were *Tmem170a* and *Rab40b*. *Tmem170a* induces formation



172 of ER sheets, the site of active protein translation<sup>35</sup>, and Rab40b is known to localize to the  
173 Golgi/endosome and regulates trafficking<sup>36</sup>. Furthermore, the srpRNA (signal recognition particle  
174 RNA) *Rn7s6*, an integral component of ER-bound ribosomes, was markedly enriched in this  
175 population (Fig. 3a-3b). The enrichment of srpRNA was also observed when expression of repeat  
176 elements was quantified (Supplementary Fig. 7). FISH showed that *Gssos2* displayed a  
177 heterogeneous and strong expression in a subset of myonuclei and that *Rian* and *Gssos2* were  
178 expressed in different nuclei; we examined more than 100 *Rian*+ or *Gssos2*+ nuclei from 2  
179 individuals and did not observe co-expressing nuclei. (Fig. 3c; Supplementary Fig. 8a). *Rian* and  
180 *Gssos2* were located away from NMJ nuclei (Supplementary Fig. 8b). Therefore, *Rian*+ and  
181 *Gssos2*+ nuclei represent independent nuclear populations.

182 Two remaining populations (*Suz12*+ and *Bcl2*+ nuclei) need further characterization. The top two  
183 markers expressed by *Suz12*+ nuclei were *Suz12*, a core Polycomb complex component, and *Halr1*  
184 transcripts, a long non-coding RNA expressed from the *Hoxa* locus, suggesting that specific  
185 mechanisms of epigenomic regulation might be used in these nuclei. *Bcl2*+ nuclei strongly  
186 expressed genes involved in steroid signaling such as *Osbpl3* (oxysterol-binding protein) and  
187 *Nr2f1* (steroids-sensing nuclear receptor).

188 Re-clustering of the bulk myonuclei in Figure 1a revealed an additional nuclear subpopulation  
189 (Fig. 3e and Supplementary Fig. 9). This new subpopulation was characterized by the enrichment  
190 of marker genes such as *Muc13* and *Gucy2e* (Fig. 3a and 3e). FISH showed that myonuclei  
191 expressing *Muc13* were always located at the very outer part of the muscle tissue near the  
192 perimysium (Fig. 3f). A previous ultrastructural study suggested that myofibers and perimysium

193 establish specialized adhesion structures<sup>37</sup>, and our data suggest that we have detected a  
194 myonuclear compartment participating in this process.

195

### 196 **snRNAseq of fibers in *Mdx* dystrophy model**

197 To begin to understand whether and how myonuclear heterogeneity is altered in muscle disease,  
198 we conducted snRNAseq on *Mdx* fibers (1,939 nuclei), a mouse model of muscular dystrophy  
199 caused by mutation of the *Dystrophin* gene (Fig. 4a and Supplementary Fig. 10a). To examine how  
200 the transcriptome of *Mdx* myonuclei is related to those of uninjured and regenerating muscle, we  
201 calculated gene signature scores of each nucleus based on the top 25 genes that distinguish  
202 uninjured and regenerating fibers. This showed that nuclei of the *Mdx* muscle mostly resembled  
203 those from the uninjured and 14 d.p.i muscle, whereas the signature of 7 d.p.i myofibers was  
204 depleted (Fig. 4b). Cluster A displayed marker genes that were largely shared with those specific  
205 to uninjured fibers like *Arrdc2*, *Glul*, *Smox* and *Gpt2* (Fig. 4c and Supplementary Fig. 4a) and  
206 might correspond to nuclei from fibers that are little damaged or undamaged.

207 We found novel nuclear populations in the *Mdx* dataset that were not identified in the  
208 uninjured/regenerating muscle. The first of these highly expressed various non-coding transcripts,  
209 and further experiments demonstrated that nuclei expressing these transcripts were located inside  
210 dying fibers (Fig. 4c and Supplementary Fig. 10b). In particular, staining with mouse IgG that  
211 identifies fibers with leaky membranes demonstrated these ncRNAs were expressed in IgG+ fibers  
212 (Fig. 4d). Further, fibers strongly expressing these ncRNAs were highly infiltrated with H2B-GFP  
213 negative cells likely corresponding to macrophages (Supplementary Fig. 10c-10d). In line with the  
214 idea that these nuclei represent dying fibers, they had low UMI counts suggesting low

215 transcriptional activity or high mRNA degradation (bottom histogram in Fig. 4c). Whether the  
216 ncRNAs are the consequence or active contributors to fiber death needs further investigation. In  
217 addition, three populations (B1-B3) located adjacent to each other in the UMAP map and had low  
218 UMI counts, but did not display any clear marker genes. We speculate that these nuclei might also  
219 originate from damaged fibers.

220 Next, we searched for the clusters identified in the uninjured and regenerating muscle. In the  
221 UMAP of the *Mdx* dataset, clusters corresponding to NMJ, MTJ-A, MTJ-B, Rian+, Gssos2+ and  
222 Bcl2+ populations were not identifiable in the UMAP. However, we detected two subpopulations  
223 also present in uninjured/regenerating muscle, Suz12+ and perimysial nuclei, pointing to some  
224 degree of specificity (Fig. 4a). We therefore used gene signature scores to identify nuclei that  
225 display a correlative expression of signature genes. Such inspection showed that MTJ-A nuclei  
226 were present in the UMAP but did not cluster together (Supplementary Fig. 10e). Nevertheless,  
227 marker genes of MTJ-A (*Tigd4* and *Col22a1*) robustly labeled the MTJ of *Mdx* muscle  
228 (Supplementary Fig. 10f). We speculate that fiber-level heterogeneity (e.g. dying fibers, intact  
229 fibers and regenerating fibers) drives the shape of the UMAP map in *Mdx*, which might interfere  
230 with the clustering of MTJ-A nuclei. Unlike MTJ-A, nuclei with high signature scores of NMJ,  
231 MTJ-B, Rian+, Gssos2+ and Bcl2+ nuclei were not detected. We investigated the expression of  
232 NMJ genes in further depth. This showed that the strict co-expression of two NMJ marker genes  
233 (*Ufsp1* and *Prkar1a*) typical for the control muscle was lost, and that these genes were instead  
234 expressed in a dispersed manner in the *Mdx* muscle (Supplementary Fig. 10f). Notably, the  
235 histological structure of the NMJ is known to be fragmented in *Mdx* mice<sup>38,39</sup>, and our data suggest  
236 that also postsynaptic nuclei are incompletely specified.

237

### 238 **Emergence of a nuclear population implicated in fiber damage repair in *Mdx* model**

239 Marker genes of the cluster ‘fiber repair’ in Figure 4a showed enrichment of ontology terms related  
240 to human muscle disease (Fig. 4e). Indeed, many top marker genes were previously reported to be  
241 mutated in human myopathies (*Flnc*, *Klhl40*, and *Fhl1*)<sup>40-42</sup> or to directly interact with proteins  
242 whose mutation causes disease (Ahnak interacts with dysferlin; Hsp7b or Xirp1 interact with  
243 Flnc)<sup>43-45</sup>. Combinatorial FISH in tissue sections confirmed co-expression of such marker genes in  
244 a subset of nuclei of *Mdx* muscle, but such nuclei were not present in control muscle (Fig. 4f,  
245 Supplementary Fig. 11a-11b). Further, nuclei expressing these genes were frequently closely  
246 spaced in fibers. We also verified that *FLNC* and *XIRP1* were co-expressed in nuclei from patient  
247 biopsies with confirmed *DYSTROPHIN* mutation, but not in healthy human muscle (Fig. 4g and  
248 Supplementary Fig. 11a).

249 Previous studies have established that Flnc and Xirp1 proteins localize to sites of myofibrillar  
250 damage to repair such insults<sup>44,46,47</sup>, whereas Dysferlin, an interaction partner of Ahnak, functions  
251 during repair of muscle membrane damage<sup>48</sup>. Our analysis shows that these genes are  
252 transcriptionally co-regulated which might occur in response to micro-damage. To substantiate  
253 that this signature is not specific to muscular dystrophy caused by *Dystrophin* mutation, we  
254 investigated whether they can be identified in *Dysferlin* deficient muscle where the continuous  
255 micro-damage to the membrane is no longer efficiently repaired<sup>48</sup>. Again, we observed nuclei co-  
256 expressing *Flnc* and *Xirp1* in this mouse disease model and in biopsies from human patients with  
257 *DYSFERLIN* mutations (Supplementary Fig. 11c-11d). We propose that the genes that mark this  
258 cluster represent a ‘repair’ signature. Notably, the accompanying paper (Petraný et al.) identified

259 a similar population during late postnatal development and in the aging muscle, indicating that the  
260 ‘repair’ genes might also function during fiber remodeling.

261 Finally, we identified another new population in the *Mdx* muscle, cluster C, that expressed marker  
262 genes such as *Gpatch2*, *Emilin1* and *Pde6a* not previously studied in a muscle context (Fig. 4c and  
263 Supplementary Table 2). The role of this population in muscle pathophysiology needs further  
264 characterization.

265

### 266 **Nuclear heterogeneity in muscle spindle fibers**

267 In principle, our approach can be used to explore nuclear heterogeneity in specific fiber types. We  
268 thus aimed to investigate heterogeneity in muscle spindles that detect muscle stretch and function  
269 in motor coordination<sup>49</sup>. Muscle spindles are extremely rare and ~10 spindles exist in a TA muscle  
270 of the mouse<sup>50</sup>. They contain bag and chain fibers, and their histology suggests further  
271 compartmentalization (Fig. 5a). *HSA-Cre* labels myonuclei of the spindle (Fig. 5b), but the  
272 overwhelming number of nuclei derive from extrafusal fibers. To overcome this, we used *Calb1-*  
273 *Cre* to specifically isolate spindle myofiber nuclei (Fig. 5b) and discovered different nuclear  
274 subtypes inside these specialized fibers (Fig. 5c).

275 Bag fibers are slow fibers and express *Myh7b*<sup>51,52</sup>, whereas chain fibers are fast. A cluster  
276 expressing *Myh7b* and *Tnnt1*, a slow type troponin isoform, was assigned to mark Bag fibers. In  
277 contrast, two clusters expressed *Myh13*, a fast type Myosin, or *Tnnt3*, a fast type troponin, which  
278 we named Chain1 and Chain2. Strikingly, we identified a cluster that expressed a set of genes  
279 largely overlapping with those identified in NMJ nuclei of extrafusal fibers, e.g. *Chrne*, *Ufsp1* and  
280 *Ache*, which we assign as the NMJ of the spindle (spdNMJ) (Fig. 5d and 5e). Furthermore, the

281 spindle myotendinous nuclei (spdMTJ) expressed a significantly overlapping set of genes as those  
282 identified in MTJ-B nuclei of extrafusal fibers (Fig. 5d and 5e). MTJ-A markers were not detected.  
283 Notably, the clusters Bag and spdNMJ expressed the mechanosensory channel *Piezo2*<sup>53</sup>. To verify  
284 the assignment and to define the identity of an additional large compartment (labeled as Sens), we  
285 validated the expression of different marker genes in H2B-GFP positive fibers of *Calb1-Cre*  
286 muscle in tissue sections (Supplementary Fig. 12b) and in fibers after manual isolation (Fig. 5f).  
287 FISH of *Calrl*, a marker of the Sens cluster, showed specific localization to the central part of  
288 spindle fibers containing densely packed nuclei, the site where sensory neurons innervate (Fig. 5f).  
289 In the same fiber, transcripts of the spdNMJ marker gene *Ufsp1* located laterally as a distinct focus.  
290 In contrast, *Piezo2* was expressed throughout the lateral contractile part of the fiber, but was  
291 excluded from the central portion. Thus, the central non-contractile part of the muscle spindle that  
292 is contacted by sensory neurons represents a fiber compartment with specialized myonuclei clearly  
293 distinguishable from the spdNMJ.

294

### 295 **Profiling transcriptional regulators across distinct compartments**

296 To gain insights into the transcriptional control of the different nuclear compartments, we  
297 investigated the expression profile of transcription factors and epigenetic regulators (Fig. 6a and  
298 Supplementary Table 3). Notably, the transcript encoding *Etv5* (also known as *Erm*), a  
299 transcription factor known to induce the NMJ transcriptome<sup>54</sup>, and its functional homolog *Etv4*  
300 were enriched in NMJ nuclei. *Irf8* (3rd rank factor in NMJ) is also interesting as mutation of an  
301 *Irf8* binding site in the *CHRNA* promoter causes *CHRNA* misexpression in the thymus and leads  
302 to the autoimmune disease myasthenia gravis<sup>55</sup>, implicating *Irf8* in the control of an NMJ gene in

303 a tissue outside of the muscle. In MTJ-A nuclei, Smad3, the effector of TGF- $\beta$  signaling, was  
304 found as the second rank factor. In addition, TGF- $\beta$  receptors were also expressed by MTJ-A  
305 myonuclei. TGF- $\beta$  is released by force from tenocytes and is required to maintain tenocytes<sup>56</sup>, but  
306 our dataset suggests that MTJ myonuclei can also receive TGF- $\beta$  signals.

307 To test whether our dataset can identify a novel and functionally relevant factor, we chose to  
308 further study Ebf1, the most strongly enriched transcription activator in MTJ-B. ChIP-Seq data of  
309 Ebf1 (ENCODE project - accession number ENCSR000DZQ) showed that Ebf1 directly binds to  
310 ~70% of the genes we identified as MTJ-B markers (Fig. 6b). In contrast, Ebf1 binds less than  
311 30% of NMJ or MTJ-A marker genes. We generated a C2C12 cell line in which Ebf1 expression  
312 was induced by doxycycline (Fig. 6c). RT-qPCR analysis of selected markers showed that many  
313 of them were induced in a dose-dependent manner upon Ebf1 over-expression (Fig. 6d), as was  
314 ColVI protein (Fig. 6c). To validate these findings *in vivo*, we analyzed *Ebf1* mutant muscle. Using  
315 FISH for *Ttn* to identify myonuclei, we observed a strong reduction of *Col6a3* and *Fstl1* transcripts  
316 in the *Ebf1* mutant compared to control MTJ myonuclei (Fig. 6e). Their expression from non-  
317 myonuclei that also express Ebf1 was also diminished. In contrast, the expression of NMJ, MTJ-  
318 A and *Rian* markers was not affected in *Ebf1* mutants (Supplementary Fig. 13). Taken together,  
319 our dataset provides a template for the identification of regulatory factors that establish or maintain  
320 these compartments.

321

## 322 **Discussion**

323 Here, we used snRNAseq to systemically characterize the transcriptional heterogeneity of  
324 myofiber nuclei. Common to all was the expression of muscle-specific genes like *Ttn*, but small

325 subpopulations were detected that expressed an additional layer of distinct and characteristic  
326 genes. Our analysis of the uninjured and regenerating muscle identified nuclear populations at  
327 anatomically distinct locations such as the NMJ and MTJ-A populations that were known to exist,  
328 as well as MTJ-B and perimysial nuclei, two populations that are first described here. Moreover,  
329 we found a number of new populations that are scattered throughout the myofiber, among them  
330 the two distinct Rian<sup>+</sup> and Gssos2<sup>+</sup> nuclear subtypes. Thus, myonuclear populations are not  
331 always associated with distinctive anatomical features. How these nuclear subtypes emerge, i.e.  
332 whether they are associated with other cell types in the muscle tissue or arise stochastically needs  
333 further study. Collectively, our data identified many genes that are specifically expressed in the  
334 various nuclear populations, providing a comprehensive resource for studying these  
335 compartments. We provide a webserver where users can freely explore the expression profile of  
336 their gene of interest in myonuclei (<https://shiny.mdc-berlin.net/MyoExplorer/>). Together, our  
337 results reveal the complexity of the regulation of gene expression in the syncytium and show how  
338 regional transcription shapes the architecture of multinucleated skeletal muscle cells.

339 Our analysis also shows that the transcriptional heterogeneity in myonuclei is dynamic. For  
340 instance, during regeneration the gene expression signatures of bulk nuclei differ from those of the  
341 uninjured muscle, and differences between early and later stages of regeneration can be detected.  
342 Further, the frequency of different myonuclear subtypes might suggest dynamic changes in nuclear  
343 compartments during regeneration (Supplementary Table 4). However, the proportion of these  
344 nuclear subtypes is low (0.5~3%) which precludes a definitive conclusion at this stage. Finally,  
345 FISH experiments showed increased expression of MTJ-A marker genes during regeneration,  
346 indicating that a higher demand for the products of MTJ genes might exist when the MTJ needs to  
347 be re-established, whereas less are needed to maintain this structure.



348 Another dynamic aspect of myonuclear heterogeneity is demonstrated by our analysis on  
349 dystrophic muscles. snRNAseq of *Mdx* muscles revealed a number of novel compartments. In  
350 particular, we identified the molecular signature of degenerating fibers and a transcriptional  
351 program that appears to be associated with fiber repair. These newly identified gene signatures  
352 might be useful for a quantitative and rapid assessment of muscle damage in the clinic. In addition  
353 to the appearance of new compartments, many nuclear subtypes present in normal muscle were  
354 lost in the *Mdx* muscle, including nuclei expressing the NMJ signature. The protein (but not the  
355 transcript) encoded by *Dystrophin* is known to be highly enriched at the NMJ, and the NMJ was  
356 previously observed to be functionally abnormal in *Mdx* mice<sup>57-59</sup>. The absence of nuclei that  
357 express the NMJ signature in the *Mdx* muscle might provide a molecular correlate for these  
358 deficits. Together, our analysis demonstrates that the use of snRNAseq can provide novel insights  
359 into the molecular pathophysiology of muscle disease.

360 Given the large size and complexity of the muscle tissue, the full diversity of myonuclei likely  
361 needs further exploration. Here, we concentrated our analysis to a single muscle group, the tibialis  
362 anterior muscle that mainly contains fast fibers, and determined the transcriptional heterogeneity  
363 and programs in uninjured, regenerating and dystrophic muscle. An accompanying manuscript  
364 (Petrany et al.) successfully used snRNAseq to define nuclear subtypes in the postnatal, adult and  
365 aged tibialis anterior muscle. The two studies identified an overlapping set of compartments, but  
366 each also found distinct ones, underlining the fact that transcriptional compartments in the muscle  
367 are highly dependent on variables like disease or age. Further, different isolation strategies and  
368 snRNA sequencing methods were used in the two studies. Our strategy identified the rare MTJ-B  
369 or perimysial nuclei subtypes that were not detected by others, and thus the strategy of genetic  
370 labeling and isolating myonuclei should be promising for the identification of new nuclear

371 subtypes in other muscle groups and contexts. Nevertheless, nuclei from the muscle spindle, a very  
372 rare and specialized fiber type, were not detected in any of the datasets that analyzed a random set  
373 of myonuclei, but we overcame this limitation by restricting the genetic labeling. The snRNAseq  
374 analysis of spindle nuclei revealed many subtypes inside these rare fibers, especially the presence  
375 of a specific compartment at the site of innervation by proprioceptive sensory neurons. More  
376 generally, our approach should be useful to investigate other syncytial cell types such as the  
377 placental trophoblasts or osteoclasts.

378

## 379 **Methods**

### 380 **Isolation of nuclei from TA muscle**

381 For each sorting of uninjured, regenerating or *Mdx* muscles, we pooled two TA muscles from two  
382 mice (one TA from each mouse). Dissected TA muscles were minced into small pieces in a 3.5  
383 cm dish on ice with scissors in 300  $\mu$ l hypotonic buffer (250 mM sucrose, 10 mM KCl, 5 mM  
384 MgCl<sub>2</sub>, 10 mM Tris-HCl pH 8.0, 25mM HEPES pH 8.0, 0.2 mM PMSF and 0.1 mM DTT  
385 supplemented with protease inhibitor tablet from Roche), and transferred with a 1 ml pipette and  
386 cut tip to a 2 ml ‘Tissue homogenizing CKMix’ tube (Bertin instruments KT03961-1-009.2)  
387 containing ceramic beads of mixed size. The dishes and tips were washed with 700  $\mu$ l hypotonic  
388 buffer. Samples were incubated on ice for 15 minutes and homogenized with Precellys 24 tissue  
389 homogenizer (Bertin instruments) for 20 seconds at 5,000 rpm. Homogenized samples were passed  
390 once through 70  $\mu$ m filter (Sysmex), twice through 20  $\mu$ m filter (Sysmex), and once through 5 ml  
391 filter cap FACS tube (Corning 352235). DAPI (Sigma) was added to final concentration of 300  
392 nM to label DNA. GFP and DAPI double positive nuclei were sorted using ARIA Sorter III (BD).

393 For isolation of muscle spindle nuclei, we employed two different protocols. In the first protocol  
394 (protocol 1 in Supplementary Fig. 12a), we used 6 TA muscles from 3 mice (3 TA muscles per 2  
395 ml homogenizer tube) and used the same procedure as described above. From this, we isolated 96  
396 nuclei. For the second procedure (protocol 2 in Supplementary Fig. 12a), we used 8 TA muscle  
397 from 4 mice (4 TA muscles per 2 ml homogenizer tube) and aimed to shorten the isolation time.  
398 For this, 0.1% Triton X-100 was added to the hypotonic buffer to solubilize the tissue debris, which  
399 are otherwise detected as independent particles during FACS. After homogenization and filtration  
400 nuclei were pelleted by centrifuging at 200 g for 10 minutes at 4°C. After aspirating the  
401 supernatant, the pellet was resuspended in 300 µl hypotonic buffer (without detergent) and passed  
402 through the FACS tube. The subsequent FACS sorting yielded 192 spindle nuclei.

403

#### 404 **Library generation and sequencing**

405 96-well plates for sorting were prepared using an automated pipetting system (Integra Viaflo).  
406 Each well contained 1.2 µl of master mix (13.2 µl 10% Triton X-100, 25 mM dNTP 22 µl, ERCC  
407 spike-in 5.5 µl and ultrapure water up to 550 µl total) and 25 ng/µl barcode primers. Plates were  
408 stored at -80°C until use.

409 After sorting single nuclei into the wells, plates were centrifuged at 4,000 g for 1 minute, incubated  
410 on incubated on 65°C for 5 minutes and immediately cooled on ice. Subsequent library generation  
411 was performed using the CEL-Seq2 protocol as described<sup>26</sup>. After reverse transcription and second  
412 strand synthesis, products of one plate were pooled into one tube and cleaned up using AMPure  
413 XP beads (Beckman Coulter). After in vitro transcription and fragmentation, aRNA was cleaned  
414 up using RNAClean XP beads (Beckman Coulter) and eluted in 7 µl ultrapure water. 1 µl of aRNA

415 was analyzed on Bioanalyzer RNA pico chip for a quality check. To construct sequencing library,  
416 5  $\mu$ g aRNA was used for reverse transcription (Superscript II, Thermofisher) and library PCR  
417 (Phusion DNA polymerase, Thermofisher). After clean up using AMPure XP beads, 1  $\mu$ l sample  
418 was ran on Bioanalyzer using a high sensitivity DNA chip to measure size distribution, which we  
419 demonstrated the presence of a peak of around 400 bp length. Further information on sequencing  
420 platforms and multiplexing are available in Supplementary Table 5.

421

## 422 **Bioinformatics analysis**

423 Single nucleus RNA-Sequencing data was processed using PiGx-scRNAseq pipeline - a derivative  
424 of a CellRanger pipeline, but enabling deterministic analysis reproducibility (version 0.1.5)<sup>60</sup>. In  
425 short, polyA sequences were removed from the reads. The reads were mapped to the genome using  
426 STAR<sup>61</sup>. Number of nuclei, for each sample, was determined using dropbead<sup>62</sup>. Finally, a  
427 combined digital expression matrix was constructed, containing all sequenced experiments.

428 Digital expression matrix post processing was performed using Seurat<sup>63</sup>. The raw data was  
429 normalized using the NormalizeData function. The expression of each nucleus was then  
430 normalized by multiplying each gene with the following scaling factor: 10000/(total number of  
431 raw counts), log(2) transformed, and subsequently scaled. Number of detected genes per nucleus  
432 was regressed out during the scaling procedure.

433 Variable genes were defined using the FindVariableGenes function with the default parameters.  
434 Samples were processed in three groups with differing parameters. Samples originating from  
435 uninjured, 7 d.p.i. and 14 d.p.i. were processed as one group, samples from the *Mdx* mouse as the  
436 second group and muscle spindle nuclei as the third group. The samples originating from different

437 biological sources contained markedly different properties – number of detected genes and UMIs,  
438 which precluded their analysis with the same parameter set.

439 To test stress response in our dataset, we used the signature of stress-induced genes identified  
440 previously<sup>23</sup>. We tested whether the stress-induced genes were co-expressed in individual cells  
441 using two different algorithms, AddModuleScore from Seurat and AUCell. The distribution of  
442 obtained scores was similar regardless of the algorithms used. Based on this, we concluded that  
443 there were only a handful nuclei (less than 10 among all the nuclei analyzed in total) which showed  
444 co-expression of known stress genes, and could therefore be considered “stressed”.

445 For samples of the first group, nuclei with less than 500 detected genes were filtered out.  
446 Subsequently, genes which were detected at least in 5 nuclei were kept for further analysis. To  
447 remove the putative confounding effect between time of sample preparation and biological  
448 variable (injury), the processed expression matrices were integrated using the  
449 FindIntegrationAnchors function with reciprocal PCA, from the Seurat package. The function uses  
450 within batch covariance structure to align multiple datasets,

451 The integration was based on 2000 top variable features, and first 30 principal components. UMAP  
452 was based on the first 15 principal components. Outlier cluster detection was done with dbSCAN  
453 ([10.18637/jss.v091.i01](https://doi.org/10.18637/jss.v091.i01)), with the following parameters  $\text{eps} = 3.4$ ,  $\text{minPts} = 20$ .

454 *Mdx* samples contain dying fibers, which have few detected transcripts, as well as others that  
455 resemble uninjured fibers. Thus, *Mdx* nuclei show a big variance in the number of detected genes.  
456 Therefore, *Mdx* samples were processed by filtering out all nuclei with less than 100 detected  
457 genes. Top 100 most variable genes were used for the principal component analysis. UMAP and

458 Louvain clustering were based on the first 15 principal components. Resolution parameter of 1  
459 was used for the Louvain clustering.

460 In muscle spindle nuclei, we detected fewer genes than in uninjured fibers, but the variance was  
461 low. Spindle cell samples were processed by filtering out all cells with less than 300 detected  
462 genes. The top 200 most variable genes were used for the principal component analysis. UMAP  
463 and Louvain clustering were based on the first 15 principal components. Resolution parameter of  
464 1 was used for the Louvain clustering.

465 For all datasets, multiple parameter sets were tested during the analysis, and the choice of  
466 parameters did not have a strong influence on the results and the derivative biological conclusions.  
467 Genes with cluster specific expression were defined using Wilcox test, as implemented in the  
468 FindAllMarkers function from the Seurat package. Genes that were detected in at least 25% of the  
469 cells in each cluster were selected for differential gene expression analysis.

470 NMJ Nuclei Definition: NMJ nuclei were identified based on the expression of three previously  
471 known markers (*Prkar1a*, *Chrne* and *Ache*), using the AddModuleScore function from the Seurat  
472 package. All cells with a score greater than 1 were selected as NMJ positive cells. NMJ marker set  
473 was expanded by comparing the fold change of gene expression in averaged NMJ positive to NMJ  
474 negative cells.

475 MTJ A and B Nuclei Definition: The original gene sets were extracted from cluster specific genes  
476 detected in the uninjured, 7 d.p.i. and 14 d.p.i. experiment. Cells were scored as MTJ A/B using  
477 the aforementioned gene set, with the AddModuleScore function. All cells which had a respective  
478 score greater than 1 were labeled as MTJ A/B positive cells.

479 *Mdx* nuclei scoring by uninjured and regenerating signatures: First, gene signatures specific for  
480 each time point were selected using the FindAllMarkers function from the Seurat library, using  
481 the default parameters. *Mdx* samples were scored using the top 25 genes per time point with the  
482 AUCell method ([10.1038/nmeth.4463](https://doi.org/10.1038/nmeth.4463)).

483 Repetitive element annotation was downloaded from the UCSC Browser database  
484 ([10.1093/nar/gky1095](https://doi.org/10.1093/nar/gky1095)) on 21.01.2020. Pseudo-bulk bigWig tracks were constructed for each  
485 cluster in uninjured, 7.d.p.i, and 14.d.p.i. The tracks were normalized to the total number of reads.  
486 Repetitive element expression was quantified using the ScoreMatrixBin function from the  
487 genomation ([10.1093/bioinformatics/btu775](https://doi.org/10.1093/bioinformatics/btu775)) package, which calculates the average per-base  
488 expression value per repetitive element. The expression was finally summarized to the repetitive  
489 element family (class) level by calculating the average expression of all repeats belonging to the  
490 corresponding family (class).

491 Transcription factor compendium, used in all analyses was downloaded from AnimalTFDB  
492 (<https://doi.org/10.1093/nar/gky822>). The expression map (Fig. 5d) for spindle fibers was created  
493 using the DotPlot from the Seurat package on a selected set of cluster specific genes. Gene  
494 ontology analysis was performed using the Enrichr program ([10.1093/nar/gkw377](https://doi.org/10.1093/nar/gkw377)).  
495 (<http://amp.pharm.mssm.edu/Enrichr/>).

496 The online tool for interactive exploration of the single-cell data – MyoExplorer, was set up using  
497 iSEE ([10.12688/f1000research.14966.1](https://doi.org/10.12688/f1000research.14966.1)).

498

499 **Mouse lines and muscle injury**

500 All experiments were conducted according to regulations established by the Max Delbrück Centre  
501 for Molecular Medicine and LAGeSo (Landesamt für Gesundheit und Soziales), Berlin. *HSA-Cre*,  
502 *Calb1-IRES-Cre* and *Mdx* mice were obtained from the Jackson laboratory. *Rosa26-Lsl-H2B-GFP*  
503 reporter line was a kind gift from Martin Goulding (Salk institute) and was described<sup>64</sup>. For  
504 experiments regarding uninjured and regenerating muscles, homozygous *Rosa26-LSL-H2B-GFP*  
505 mice with heterozygous *HSA-Cre* were used. For *Calb1-IRES-Cre* and *Mdx* experiments, the *H2B-*  
506 *GFP* allele was heterozygous. Nuclei were isolated from muscle of 2.5 months old mice.  
507 Genotyping was performed as instructed by the Jackson laboratory. For genotyping of the *Rosa26-*  
508 *Lsl-H2B-GFP* reporter, the following primers were used. Rosa4; 5'- TCA  
509 ATGGGCGGGGGTTCGTT-3', Rosa10; 5'-CTCTGCTGCCTCCTGGCTTCT-3', Rosa11; 5'-  
510 CGAGGCGGATCACAAGCAATA-3'. *Ebf1* mutants<sup>65</sup> and *Dysferlin* mis-sense mutants<sup>66</sup> were  
511 described. To induce muscle injury, 30µl of cardiotoxin (10 µM, Latoxan, Porte les Vaence,  
512 France) was injected into the tibialis anterior (TA) muscle. Further information on mouse  
513 conditions are summarized in Supplementary Table 5.

514

### 515 **Preparation of tissue sections**

516 Freshly isolated TA muscles were embedded in OCT compound and processed as previously  
517 described<sup>67</sup>. Frozen tissue blocks were sectioned to 12-16 µm thickness, which were stored at -  
518 80°C until future use.

519

### 520 **Single-molecule FISH (RNAscope)**



521 Otherwise specifically indicated as ‘coventional FISH’ in the figure legends, all the FISH  
522 experiments were single molecule FISH using RNAscope. RNAscope\_V2 kit was used according  
523 to manufacturer’s instructions (ACD/bio-technie). We used Proteinase IV. When combined with  
524 antibody staining, after the last washing step of RNA Scope, the slides were blocked with 1% horse  
525 serum and 0.25% BSA in PBX followed by primary antibody incubation overnight on 4°C. The  
526 subsequent procedures were the same as regular immunohistochemistry. Slides were mounted with  
527 Prolonged Antifade mounting solution (Thermofisher). The following probes were used in this  
528 study; Smox (559431), Mettl21c (566631), Pdk4 (437161), Ttn (483031), Rian (510531); also  
529 synthesized in c2, Vav3 (437431), Col6a3 (552541), Egr1 (423371), Gm10800 (479861), Myh2  
530 (452731-c2) and Calcr1 (452281). The following probes were newly designed; Arrdc2 (c1), Cish  
531 (c1), Nmrk2 (c1), Slc26a2 (c1), Prkar1a (c1), Tigd4 (c1), Muc13 (c1), Gssos2 (c1), Flnc (c1),  
532 Klhl40 (c1), Myh1 (c1), Col22a1 (c2), Ufsp1 (c2), Gm10801 (c2), Xirp1 (c2), Fst11 (c2), human  
533 Flnc (c2), Ablim2 (c3), Myh2 (c3) and human Xirp1 (c3).

534

### 535 **Preparation of conventional FISH probes**

536 Probes of 500-700 bp length spanning exon-exon junction parts were designed using software in  
537 NCBI website. Forward and reverse primers included Xho1 restriction site and T3 promoter  
538 sequence, respectively. cDNA samples prepared from E13.5-E14.5 whole embryos were used to  
539 amplify the target probes using GO Taq DNA polymerase (Promega). PCR products were cloned  
540 into pGEM-T Easy vector (Promega) according to manufacturer’s guideline, and the identity of  
541 the inserts was confirmed by sequencing. 2 µg of cloned plasmid DNA was linearized, 500 ng  
542 DNA was subjected to *in vitro* transcription with T3 polymerase and DIG- or FITC- labeled

543 ribonucleotides (All Roche) for 2 hours at 37°C. Synthesized RNA probes were purified using  
544 RNeasy kit (Qiagen). Probes were eluted in 50 µl ultrapure water (Sigma), and 50 µl formamide  
545 was added. We checked the RNA quality and quantity by loading 5 µl RNA to 2% agarose gel.  
546 Until future use, probes were stored in -80°C. The annealing sequences of the FISH probes used  
547 in this study are available in Supplementary Table 6.

548

### 549 **Conventional FISH and immunohistochemistry**

550 Basic procedure for conventional FISH was described before<sup>67</sup> with minor modifications to use  
551 fluorescence for final detection. After hybridizing the tissue sections with DIG- labeled probes,  
552 washing, RNase digestion and anti-DIG antibody incubation, amplification reaction was carried  
553 out using TSA-Rhodamine (1:75 and 0.001% H<sub>2</sub>O<sub>2</sub>). After washing, slides were mounted with  
554 Immu-Mount (Thermo Scientific). When applicable, GFP antibody was added together with anti-  
555 DIG antibody.

556 When conducting double FISH, the tissue was hybridized with DIG- and FITC-labeled probes,  
557 after detection of the DIG signal, slides were treated with 3% H<sub>2</sub>O<sub>2</sub> for 15 minutes and then with  
558 4% PFA for one hour at room temperature to eliminate residual peroxidase activity. The second  
559 amplification reaction was performed using anti-FITC antibody and TSA-biotin (1:50), which was  
560 visualized using Cy5-conjugated anti-streptavidin.

561 Antibodies used for this study were: GFP (Aves labs, 1:500), Col3 (Novus, 1:500), ColIV  
562 (Millipore, 1:500), CD31-PE (Biolegend, 1:200), F4/80 (Abcam ab6640, 1:500) and Laminin  
563 (Sigma L9393, 1:500). For Pax7, we used an antigen retrieval step. For this, after fixation and PBS  
564 washing, slides were incubated in antigen retrieval buffer (diluted 1:100 in water; Vector) pre-

565 heated to 80°C for 15 minutes. Slides were washed in PBS and continued at permeabilization step.

566 Cy2-, Cy3- and Cy5-conjugated secondary antibodies were purchased from Dianova.

567

### 568 **FISH experiments using isolated single fibers**

569 We isolated single extensor digitorum longus (EDL) muscle fibers as described before<sup>68</sup>. Isolated

570 EDL fibers were immediately fixed with 4% PFA and were subjected hybridization in 1.5 ml tubes.

571 After DAPI staining, fibers were transferred on slide glasses and mounted. Spindle fibers were

572 vulnerable to collagenase treatment. Thus, we pre-fixed the EDL tissue and peeled off spindles

573 under the fluorescent dissecting microscope (Leica).

574

### 575 **Acquisition of fluorescence images**

576 Fluorescence was visualized by laser-scanning microscopy (LSM700, Carl-Zeiss) using Zen 2009

577 software. Images were processed using ImageJ and Adobe Photoshop, and assembled using Adobe

578 Illustrator.

579

### 580 **Cell culture**

581 C2C12 cell line was purchased from ATCC, and cultured in high glucose DMEM (Gibco)

582 supplemented with 10% FBS (Sigma) and Penicillin-Streptomycin (Sigma). To engineer C2C12

583 cells with doxycycline (Sigma) inducible Ebf1, mouse Ebf1 cDNA (Addgene) was cloned into

584 pLVX Tet-One Puro plasmid (Clontech), packaged in 293T cells (from ATCC) using psPAX2 and

585 VsvG (Addgene), followed by viral transduction to C2C12 cells with 5  $\mu\text{g}/\mu\text{l}$  polybrene  
586 (Millipore). Transduced cells were selected using 3  $\mu\text{g}/\mu\text{l}$  puromycin (Sigma).

587

### 588 **Western blotting**

589 Cell pellets were resuspended in NP-40 lysis buffer (1% NP-40, 150 mM NaCl, 50 mM Tris-Cl  
590 pH 7.5, 1 mM MgCl<sub>2</sub> supplemented with protease (Roche) and phosphatase (Sigma) inhibitors),  
591 and incubated on ice for 20 minutes. Lysates were cleared by centrifuging in 16,000 g for 20 min  
592 at 4°C. Protein concentration was measured by Bradford assay (Biorad), and lysates were boiled  
593 in Laemilli buffer with beta-mercaptoethanol for 10 minutes. Denatured lysates were fractionated  
594 by SDS-PAGE, transferred into nitrocellulose membrane, blocked with 5% milk and 0.1% Tween-  
595 20 in PBS, and incubated overnight in 4°C with primary antibodies diluted in 5% BSA and 0.1%  
596 Tween-20 in PBS. After three times washing with PBST, membranes were incubated with  
597 secondary antibodies diluted in blocking solution for one hour at room temperature. After PBST  
598 washing, membranes were developed with prime ECL (Amarsham). The antibodies used for this  
599 study were  $\beta$ -actin (Cell Signaling, 1:1000), ColVI (Abcam, 1:2000) and Ebf1 (1:1000).

600

### 601 **RT-qPCR**

602 Cell pellets were resuspended in 1 ml Trizol (Thermofisher). RNA was isolated according to  
603 manufacturer's guideline. 1  $\mu\text{g}$  of isolated RNA and random hexamer primer (Thermofisher) were  
604 used for reverse transcription using ProtoScipt II RT (NEB). Synthesized cDNA was diluted five  
605 times in water, and 1  $\mu\text{l}$  was used per one qPCR reaction. qPCR was performed using 2X Syber

606 green mix (Thermofisher) and CFX96 machine (Biorad). We used  $\beta$ -actin for normalization.  
607 Primers were selected from the 'Primer bank' website. The RT-qPCR primers used in this study  
608 are available in Supplementary Table 6.

609

## 610 **Human biopsies**

611 Human muscle biopsy specimens were obtained from M. vastus lateralis. We selected wheelchair-  
612 bound patients with confirmed *DYSTROPHIN* or *DYSF* mutations and severe dystrophic  
613 myopathological alterations defined by histology of biopsies. The exact mutations are indicated in  
614 the corresponding Figure legends. The tissues were snap frozen under cryoprotection. Research  
615 use of the material was approved by the regulatory agencies (EA1/203/08, EA2/051/10,  
616 EA2/175/17, Charité Universitätsmedizin Berlin, Germany). Informed consent was obtained from  
617 the donors.

618

## 619 **Reporting summary**

620 Further information on research design is available in the Nature Research Reporting summary  
621 linked to this article.

622

## 623 **Data availability**

624 The next-generation sequencing datasets generated in this study are available in the ArrayExpress  
625 under accession numbers E-MTAB-8623. The raw DGE count matrix in loom format is available

626 in [http://bimsbstatic.mdc-berlin.de/akalin/MyoExplorer/mm10\\_UMI.loom](http://bimsbstatic.mdc-berlin.de/akalin/MyoExplorer/mm10_UMI.loom). Preliminary DGE  
627 matrix as a Seurat object is available in [http://bimsbstatic.mdc-](http://bimsbstatic.mdc-berlin.de/akalin/MyoExplorer/mm10.Seurat.RDS)  
628 [berlin.de/akalin/MyoExplorer/mm10.Seurat.RDS](http://bimsbstatic.mdc-berlin.de/akalin/MyoExplorer/mm10.Seurat.RDS). Also, we provide an interactive webpage where  
629 the users can explore their gene of interest ([https://shiny.mdc-berlin.net/Myocyte\\_scNuc/](https://shiny.mdc-berlin.net/Myocyte_scNuc/)).  
630 Uncropped Western blot images are provided in Supplementary Figure 14. The data that support  
631 the findings of this study are available from the corresponding authors upon reasonable requests.

632

### 633 **Code availability**

634 The codes used in this study are accessible in github server  
635 (<https://github.com/BIMSBbioinfo/MyoExplorer>).

636

### 637 **References**

- 638 1 Banani, S. F., Lee, H. O., Hyman, A. A. & Rosen, M. K. Biomolecular condensates:  
639 organizers of cellular biochemistry. *Nat Rev Mol Cell Biol* **18**, 285-298,  
640 doi:10.1038/nrm.2017.7 (2017).
- 641 2 Mostov, K., Su, T. & ter Beest, M. Polarized epithelial membrane traffic: conservation  
642 and plasticity. *Nat Cell Biol* **5**, 287-293, doi:10.1038/ncb0403-287 (2003).
- 643 3 Kennedy, M. J. & Ehlers, M. D. Organelles and trafficking machinery for postsynaptic  
644 plasticity. *Annu Rev Neurosci* **29**, 325-362,  
645 doi:10.1146/annurev.neuro.29.051605.112808 (2006).

- 646 4 Cambronne, X. A. *et al.* Biosensor reveals multiple sources for mitochondrial NAD(+).  
647 *Science* **352**, 1474-1477, doi:10.1126/science.aad5168 (2016).
- 648 5 Tintignac, L. A., Brenner, H. R. & Ruegg, M. A. Mechanisms Regulating Neuromuscular  
649 Junction Development and Function and Causes of Muscle Wasting. *Physiological*  
650 *reviews* **95**, 809-852, doi:10.1152/physrev.00033.2014 (2015).
- 651 6 Hall, Z. W. & Sanes, J. R. Synaptic structure and development: the neuromuscular  
652 junction. *Cell* **72 Suppl**, 99-121, doi:10.1016/s0092-8674(05)80031-5 (1993).
- 653 7 Jasmin, B. J., Lee, R. K. & Rotundo, R. L. Compartmentalization of acetylcholinesterase  
654 mRNA and enzyme at the vertebrate neuromuscular junction. *Neuron* **11**, 467-477,  
655 doi:10.1016/0896-6273(93)90151-g (1993).
- 656 8 Schaeffer, L., de Kerchove d'Exaerde, A. & Changeux, J. P. Targeting transcription to the  
657 neuromuscular synapse. *Neuron* **31**, 15-22, doi:10.1016/s0896-6273(01)00353-1 (2001).
- 658 9 Sanes, J. R. & Lichtman, J. W. Induction, assembly, maturation and maintenance of a  
659 postsynaptic apparatus. *Nat Rev Neurosci* **2**, 791-805, doi:10.1038/35097557 (2001).
- 660 10 Maartens, A. P. & Brown, N. H. The many faces of cell adhesion during *Drosophila*  
661 muscle development. *Dev Biol* **401**, 62-74, doi:10.1016/j.ydbio.2014.12.038 (2015).
- 662 11 Schweitzer, R., Zelzer, E. & Volk, T. Connecting muscles to tendons: tendons and  
663 musculoskeletal development in flies and vertebrates. *Development* **137**, 2807-2817,  
664 doi:10.1242/dev.047498 (2010).
- 665 12 Baumeister, A., Arber, S. & Caroni, P. Accumulation of muscle ankyrin repeat protein  
666 transcript reveals local activation of primary myotube endcompartments during muscle  
667 morphogenesis. *J Cell Biol* **139**, 1231-1242, doi:10.1083/jcb.139.5.1231 (1997).

- 668 13 Koch, M. *et al.* A novel marker of tissue junctions, collagen XXII. *J Biol Chem* **279**,  
669 22514-22521, doi:10.1074/jbc.M400536200 (2004).
- 670 14 Kraft-Sheleg, O. *et al.* Localized LoxL3-Dependent Fibronectin Oxidation Regulates  
671 Myofiber Stretch and Integrin-Mediated Adhesion. *Dev Cell* **36**, 550-561,  
672 doi:10.1016/j.devcel.2016.02.009 (2016).
- 673 15 Papadopoulos, S., Jurgens, K. D. & Gros, G. Protein diffusion in living skeletal muscle  
674 fibers: dependence on protein size, fiber type, and contraction. *Biophys J* **79**, 2084-2094,  
675 doi:10.1016/S0006-3495(00)76456-3 (2000).
- 676 16 Pavlath, G. K., Rich, K., Webster, S. G. & Blau, H. M. Localization of muscle gene  
677 products in nuclear domains. *Nature* **337**, 570-573, doi:10.1038/337570a0 (1989).
- 678 17 Newlands, S. *et al.* Transcription occurs in pulses in muscle fibers. *Genes Dev* **12**, 2748-  
679 2758, doi:10.1101/gad.12.17.2748 (1998).
- 680 18 Giordani, L. *et al.* High-Dimensional Single-Cell Cartography Reveals Novel Skeletal  
681 Muscle-Resident Cell Populations. *Mol Cell* **74**, 609-621 e606,  
682 doi:10.1016/j.molcel.2019.02.026 (2019).
- 683 19 Dell'Orso, S. *et al.* Single cell analysis of adult mouse skeletal muscle stem cells in  
684 homeostatic and regenerative conditions. *Development* **146**, doi:10.1242/dev.174177  
685 (2019).
- 686 20 Rubenstein, A. B. *et al.* Single-cell transcriptional profiles in human skeletal muscle.  
687 *Scientific reports* **10**, 229, doi:10.1038/s41598-019-57110-6 (2020).
- 688 21 Zeng, W. *et al.* Single-nucleus RNA-seq of differentiating human myoblasts reveals the  
689 extent of fate heterogeneity. *Nucleic acids research* **44**, e158, doi:10.1093/nar/gkw739  
690 (2016).



- 691 22 Schmalbruch, H. The morphology of regeneration of skeletal muscles in the rat. *Tissue*  
692 *Cell* **8**, 673-692, doi:10.1016/0040-8166(76)90039-2 (1976).
- 693 23 van den Brink, S. C. *et al.* Single-cell sequencing reveals dissociation-induced gene  
694 expression in tissue subpopulations. *Nature methods* **14**, 935-936,  
695 doi:10.1038/nmeth.4437 (2017).
- 696 24 Machado, L. *et al.* In Situ Fixation Redefines Quiescence and Early Activation of  
697 Skeletal Muscle Stem Cells. *Cell reports* **21**, 1982-1993,  
698 doi:10.1016/j.celrep.2017.10.080 (2017).
- 699 25 van Velthoven, C. T. J., de Morree, A., Egner, I. M., Brett, J. O. & Rando, T. A.  
700 Transcriptional Profiling of Quiescent Muscle Stem Cells In Vivo. *Cell Rep* **21**, 1994-  
701 2004, doi:10.1016/j.celrep.2017.10.037 (2017).
- 702 26 Hashimshony, T. *et al.* CEL-Seq2: sensitive highly-multiplexed single-cell RNA-Seq.  
703 *Genome biology* **17**, 77, doi:10.1186/s13059-016-0938-8 (2016).
- 704 27 Ding, J. *et al.* Systematic comparison of single-cell and single-nucleus RNA-sequencing  
705 methods. *Nat Biotechnol* **38**, 737-746, doi:10.1038/s41587-020-0465-8 (2020).
- 706 28 Augusto, V. *et al.* Skeletal muscle fiber types in C57BL6J mice. *Braz. J. morphol. Sci.*  
707 **21**, 2, 89-94 (2004).
- 708 29 Bao, Z. Z., Lakonishok, M., Kaufman, S. & Horwitz, A. F. Alpha 7 beta 1 integrin is a  
709 component of the myotendinous junction on skeletal muscle. *Journal of cell science* **106**  
710 **( Pt 2)**, 579-589 (1993).
- 711 30 Charvet, B. *et al.* Knockdown of col22a1 gene in zebrafish induces a muscular dystrophy  
712 by disruption of the myotendinous junction. *Development* **140**, 4602-4613,  
713 doi:10.1242/dev.096024 (2013).

- 714 31 Can, T. *et al.* Proteomic analysis of laser capture microscopy purified myotendinous  
715 junction regions from muscle sections. *Proteome science* **12**, 25, doi:10.1186/1477-5956-  
716 12-25 (2014).
- 717 32 Jobsis, G. J. *et al.* Type VI collagen mutations in Bethlem myopathy, an autosomal  
718 dominant myopathy with contractures. *Nature genetics* **14**, 113-115, doi:10.1038/ng0996-  
719 113 (1996).
- 720 33 Labialle, S. *et al.* The miR-379/miR-410 cluster at the imprinted Dlk1-Dio3 domain  
721 controls neonatal metabolic adaptation. *The EMBO journal* **33**, 2216-2230,  
722 doi:10.15252/embj.201387038 (2014).
- 723 34 Wust, S. *et al.* Metabolic Maturation during Muscle Stem Cell Differentiation Is  
724 Achieved by miR-1/133a-Mediated Inhibition of the Dlk1-Dio3 Mega Gene Cluster. *Cell*  
725 *metabolism* **27**, 1026-1039 e1026, doi:10.1016/j.cmet.2018.02.022 (2018).
- 726 35 Christodoulou, A., Santarella-Mellwig, R., Santama, N. & Mattaj, I. W. Transmembrane  
727 protein TMEM170A is a newly discovered regulator of ER and nuclear envelope  
728 morphogenesis in human cells. *Journal of cell science* **129**, 1552-1565,  
729 doi:10.1242/jcs.175273 (2016).
- 730 36 Jacob, A. *et al.* Rab40b regulates trafficking of MMP2 and MMP9 during invadopodia  
731 formation and invasion of breast cancer cells. *Journal of cell science* **126**, 4647-4658,  
732 doi:10.1242/jcs.126573 (2013).
- 733 37 Passerieux, E. *et al.* Structural organization of the perimysium in bovine skeletal muscle:  
734 Junctional plates and associated intracellular subdomains. *Journal of structural biology*  
735 **154**, 206-216, doi:10.1016/j.jsb.2006.01.002 (2006).

- 736 38 Haddix, S. G., Lee, Y. I., Kornegay, J. N. & Thompson, W. J. Cycles of myofiber  
737 degeneration and regeneration lead to remodeling of the neuromuscular junction in two  
738 mammalian models of Duchenne muscular dystrophy. *PloS one* **13**, e0205926,  
739 doi:10.1371/journal.pone.0205926 (2018).
- 740 39 Pratt, S. J. P., Valencia, A. P., Le, G. K., Shah, S. B. & Lovering, R. M. Pre- and  
741 postsynaptic changes in the neuromuscular junction in dystrophic mice. *Frontiers in*  
742 *physiology* **6**, 252, doi:10.3389/fphys.2015.00252 (2015).
- 743 40 Ravenscroft, G. *et al.* Mutations in KLHL40 are a frequent cause of severe autosomal-  
744 recessive nemaline myopathy. *Am J Hum Genet* **93**, 6-18, doi:10.1016/j.ajhg.2013.05.004  
745 (2013).
- 746 41 Vorgerd, M. *et al.* A mutation in the dimerization domain of filamin c causes a novel type  
747 of autosomal dominant myofibrillar myopathy. *American journal of human genetics* **77**,  
748 297-304, doi:10.1086/431959 (2005).
- 749 42 Windpassinger, C. *et al.* An X-linked myopathy with postural muscle atrophy and  
750 generalized hypertrophy, termed XMPMA, is caused by mutations in FHL1. *American*  
751 *journal of human genetics* **82**, 88-99, doi:10.1016/j.ajhg.2007.09.004 (2008).
- 752 43 Huang, Y. *et al.* AHNAK, a novel component of the dysferlin protein complex,  
753 redistributes to the cytoplasm with dysferlin during skeletal muscle regeneration. *FASEB*  
754 *journal : official publication of the Federation of American Societies for Experimental*  
755 *Biology* **21**, 732-742, doi:10.1096/fj.06-6628com (2007).
- 756 44 Molt, S. *et al.* Aciculin interacts with filamin C and Xin and is essential for myofibril  
757 assembly, remodeling and maintenance. *Journal of cell science* **127**, 3578-3592,  
758 doi:10.1242/jcs.152157 (2014).

- 759 45 Juo, L. Y. *et al.* HSPB7 interacts with dimerized FLNC and its absence results in  
760 progressive myopathy in skeletal muscles. *Journal of cell science* **129**, 1661-1670,  
761 doi:10.1242/jcs.179887 (2016).
- 762 46 Leber, Y. *et al.* Filamin C is a highly dynamic protein associated with fast repair of  
763 myofibrillar microdamage. *Human molecular genetics* **25**, 2776-2788,  
764 doi:10.1093/hmg/ddw135 (2016).
- 765 47 Otten, C. *et al.* Xirp proteins mark injured skeletal muscle in zebrafish. *PloS one* **7**,  
766 e31041, doi:10.1371/journal.pone.0031041 (2012).
- 767 48 Bansal, D. *et al.* Defective membrane repair in dysferlin-deficient muscular dystrophy.  
768 *Nature* **423**, 168-172, doi:10.1038/nature01573 (2003).
- 769 49 Hunt, C. C. Mammalian muscle spindle: peripheral mechanisms. *Physiological reviews*  
770 **70**, 643-663, doi:10.1152/physrev.1990.70.3.643 (1990).
- 771 50 Cheret, C. *et al.* Bace1 and Neuregulin-1 cooperate to control formation and maintenance  
772 of muscle spindles. *The EMBO journal* **32**, 2015-2028, doi:10.1038/emboj.2013.146  
773 (2013).
- 774 51 Schiaffino, S. & Reggiani, C. Fiber types in mammalian skeletal muscles. *Physiological*  
775 *reviews* **91**, 1447-1531, doi:10.1152/physrev.00031.2010 (2011).
- 776 52 Rossi, A. C., Mammucari, C., Argentini, C., Reggiani, C. & Schiaffino, S. Two  
777 novel/ancient myosins in mammalian skeletal muscles: MYH14/7b and MYH15 are  
778 expressed in extraocular muscles and muscle spindles. *The Journal of physiology* **588**,  
779 353-364, doi:10.1113/jphysiol.2009.181008 (2010).
- 780 53 Coste, B. *et al.* Piezo1 and Piezo2 are essential components of distinct mechanically  
781 activated cation channels. *Science* **330**, 55-60, doi:10.1126/science.1193270 (2010).

- 782 54 Hippenmeyer, S., Huber, R. M., Ladle, D. R., Murphy, K. & Arber, S. ETS transcription  
783 factor Erm controls subsynaptic gene expression in skeletal muscles. *Neuron* **55**, 726-  
784 740, doi:10.1016/j.neuron.2007.07.028 (2007).
- 785 55 Giraud, M. *et al.* An IRF8-binding promoter variant and AIRE control CHRNA1  
786 promiscuous expression in thymus. *Nature* **448**, 934-937, doi:10.1038/nature06066  
787 (2007).
- 788 56 Maeda, T. *et al.* Conversion of mechanical force into TGF-beta-mediated biochemical  
789 signals. *Curr Biol* **21**, 933-941, doi:10.1016/j.cub.2011.04.007 (2011).
- 790 57 Khurana, T. S. *et al.* Immunolocalization and developmental expression of dystrophin  
791 related protein in skeletal muscle. *Neuromuscul Disord* **1**, 185-194, doi:10.1016/0960-  
792 8966(91)90023-1 (1991).
- 793 58 Lyons, P. R. & Slater, C. R. Structure and function of the neuromuscular junction in  
794 young adult mdx mice. *J Neurocytol* **20**, 969-981, doi:10.1007/BF01187915 (1991).
- 795 59 Grady, R. M. *et al.* Maturation and maintenance of the neuromuscular synapse: genetic  
796 evidence for roles of the dystrophin--glycoprotein complex. *Neuron* **25**, 279-293,  
797 doi:10.1016/s0896-6273(00)80894-6 (2000).
- 798 60 Wurmus, R. *et al.* PiGx: reproducible genomics analysis pipelines with GNU Guix.  
799 *GigaScience* **7**, doi:10.1093/gigascience/giy123 (2018).
- 800 61 Dobin, A. *et al.* STAR: ultrafast universal RNA-seq aligner. *Bioinformatics* **29**, 15-21,  
801 doi:10.1093/bioinformatics/bts635 (2013).
- 802 62 Alles, J. *et al.* Cell fixation and preservation for droplet-based single-cell transcriptomics.  
803 *BMC biology* **15**, 44, doi:10.1186/s12915-017-0383-5 (2017).

- 804 63 Butler, A., Hoffman, P., Smibert, P., Papalexi, E. & Satija, R. Integrating single-cell  
805 transcriptomic data across different conditions, technologies, and species. *Nature*  
806 *biotechnology* **36**, 411-420, doi:10.1038/nbt.4096 (2018).
- 807 64 Li, Y. *et al.* Molecular layer perforant path-associated cells contribute to feed-forward  
808 inhibition in the adult dentate gyrus. *Proceedings of the National Academy of Sciences of*  
809 *the United States of America* **110**, 9106-9111, doi:10.1073/pnas.1306912110 (2013).
- 810 65 Lin, H. & Grosschedl, R. Failure of B-cell differentiation in mice lacking the  
811 transcription factor EBF. *Nature* **376**, 263-267, doi:10.1038/376263a0 (1995).
- 812 66 Malcher, J. *et al.* Exon Skipping in a Dysf-Missense Mutant Mouse Model. *Molecular*  
813 *therapy. Nucleic acids* **13**, 198-207, doi:10.1016/j.omtn.2018.08.013 (2018).
- 814 67 Muller, T. *et al.* The homeodomain factor *lhx1* distinguishes two major programs of  
815 neuronal differentiation in the dorsal spinal cord. *Neuron* **34**, 551-562,  
816 doi:10.1016/s0896-6273(02)00689-x (2002).
- 817 68 Vogler, T. O., Gadek, K. E., Cadwallader, A. B., Elston, T. L. & Olwin, B. B. Isolation,  
818 Culture, Functional Assays, and Immunofluorescence of Myofiber-Associated Satellite  
819 Cells. *Methods in molecular biology* **1460**, 141-162, doi:10.1007/978-1-4939-3810-0\_11  
820 (2016).

821

## 822 **Acknowledgements**

823 We thank Dr. K. Song for advice and protocols on snRNAseq and Dr. T. Muller for critical reading  
824 of the manuscript, C. Paeseler and P. Stallerow for help with animal care (all MDC), as well as the  
825 MDC core facilities for flow cytometry (led by Dr. Hans-Peter Rahn) and next generation

826 sequencing (led by Dr. Sascha Sauer). We are grateful to Dr. Martyn Goulding (Salk institute) for  
827 providing the H2B-GFP reporter mouse line, and Drs. M. Derecka and R. Grosschedl (MPI for  
828 Immunobiology and Epigenetics) for providing Ebf1 tissues and reagents. This work was  
829 supported by the Helmholtz association (C.B) and AVH postdoctoral fellowship (M.K).

830

### 831 **Author contributions**

832 M.K and C.B conceived the work and designed the project. M.K. led the project, performed the  
833 experiments and analyzed the data. V.F and A.A performed the bioinformatics analysis. B.B  
834 contributed to the experiments, especially generated the sequencing library. E.D.L also helped with  
835 library generation. V.S and S.S collected and prepared human patient biopsies and *dysferlin* mutant  
836 mouse samples. M.K and C.B wrote the manuscript with comments by all authors.

837 **Competing interests:** We have no conflicting interests.

838 **Materials & correspondence:** Requests for reagents should be addressed to [cbirch@mdc-](mailto:cbirch@mdc-berlin.de)  
839 [berlin.de](mailto:cbirch@mdc-berlin.de)

840

### 841 **Figure legends**

842 **Figure 1. Nuclear heterogeneity in uninjured and regenerating muscles.** **a**, UMAP plot of  
843 transcripts detected in nuclei of uninjured and regenerating muscles. The colors identify different  
844 nuclear populations (left) or nuclei in uninjured or regenerating muscle (right). **b**, Expression of  
845 *Ttn* and *Myosin* genes identifies myonuclei. **c**, Heat-map of specific genes enriched in clusters  
846 other than the bulk myonuclei. Top representative genes are indicated on the side. **d**, Violin plots

847 of the previously known or newly identified NMJ marker genes. The perimysium population is  
848 identified after re-clustering the bulk myonuclei and described further in Figure 3. **e**, Upper row -  
849 conventional FISH against a known NMJ marker (*Prkar1a*) and newly identified NMJ genes  
850 (green). Bottom row – single molecule FISH against *Ufsp1* (red) and other newly identified NMJ  
851 genes (green). Expression patterns were validated in 2 or more individuals. Scale bar, 10  $\mu\text{m}$ .

852

853 **Figure 2. Two distinct nuclear populations at the myotendinous junction.** **a**, Marker genes  
854 enriched in MTJ-A or MTJ-B nuclei are presented by violin plots. **b**, Upper two rows – single  
855 molecule FISH of two MTJ-A markers (*Tigd4* and *Col22a1*) in uninjured or 14 d.p.i TA muscle  
856 expressing H2B-GFP in myonuclei. Bottom row – Ebf1 (MTJ-B marker) immunofluorescence in  
857 uninjured TA muscle expressing H2B-GFP in myonuclei. Shown are MTJ regions; T, tendon and  
858 M, myofiber. Arrowheads indicate co-localization of MTJ marker genes and GFP. Scale bar,  
859 30 $\mu\text{m}$ . **c**, Conventional FISH experiment in an isolated single EDL fiber. Insets show  
860 magnification of MTJ (i) and NMJ (ii) regions. Scale bars, 100  $\mu\text{m}$  (for the entire fiber) and 30  $\mu\text{m}$   
861 (for the insets). Expression patterns were validated in 2 or more individuals.

862

863 **Figure 3. Identification of novel nuclear subtypes.** **a**, Marker genes enriched in each of the  
864 novel nuclear population are presented by violin plots. **b**, Illustration of potential functions of  
865 Rian<sup>+</sup> and Gssos2<sup>+</sup> nuclei. Rian<sup>+</sup> nuclei might regulate local mitochondrial metabolism through  
866 microRNAs embedded in *Dlk1-Dio3* locus, whereas Gssos2<sup>+</sup> nuclei potentially regulate local  
867 protein synthesis and entry into the secretory pathway. **c**, Validation of the top markers of Rian<sup>+</sup>  
868 and Gssos2<sup>+</sup> nuclei by single molecule FISH in uninjured muscles. Note their strong expression



869 in a subset of myonuclei (arrows). Scale bar, 30  $\mu\text{m}$ . **d**, Expression of *Rian* in isolated EDL fibers.  
870 Insets show magnifications of indicated regions. Scale bars, 100  $\mu\text{m}$  (for entire fibers) and 30  $\mu\text{m}$   
871 (for insets). **e**, (Left) UMAP plot of re-clustered bulk myonuclei identified in Figure 1a. (Right)  
872 Heat-map showing differentially expressed genes in perimysium (peri.) nuclei versus rest of the  
873 bulk myonuclei. Averaged gene expression levels are shown for each gene. **f**, Validation of *Muc13*  
874 expression in myonuclei adjacent to the perimysium by single molecule FISH in uninjured muscle.  
875 Scale bar, 30  $\mu\text{m}$ . Expression patterns were validated in 2 or more individuals.

876

877 **Figure 4. snRNAseq analysis of *Mdx* muscle.** **a**, UMAP plot of *Mdx* myonuclei (1,939 nuclei).  
878 **b**, Each *Mdx* myonucleus was assigned a gene signature score, i.e. a gene expression score  
879 indicating similarity with uninjured (uninj.), 7 or 14 d.p.i. myonuclei. Each column represents an  
880 individual nucleus. **c**, Marker genes enriched in each population are presented by violin plots. The  
881 bottommost histogram shows nUMI in each population. **d**, The ncRNA *Gm10801* is expressed in  
882 IgG-positive fibers, indicating that it defines nuclei of necrotic fibers. **e**, Fiber repair myonuclei  
883 express high levels of various genes implicated in fiber repair that are implicated in myopathies.  
884 The p-values were corrected using the Benjamini-Hochberg (BH) procedure. **f**, Indicated marker  
885 genes of the cluster in e are co-expressed in longitudinal muscle sections of *Mdx* mice. **g**, Co-  
886 expression of *FLNC* and *XIRP1* in the muscle from dystrophy patients carrying mutations in the  
887 *DYSTROPHIN* gene (*DYS* del exons 15-18; *DYS* c.2323A>C). Control images for f and g are shown  
888 in Supplementary Fig. 11a. All scale bars, 50  $\mu\text{m}$ . Expression patterns were validated in 2 or more  
889 individuals.

890

891 **Figure 5. Functional compartments inside muscle spindle fibers.** **a**, Schema showing the  
892 structure of the muscle spindle. **b**, Specific labeling of spindle myonuclei using *Calb1-Ires-Cre*.  
893 Arrows indicate muscle spindles. **c**, UMAP plot of muscle spindle myonuclei (260 nuclei). **d**,  
894 Expression map of nuclear populations identified in **c**. **e**, Venn diagram comparing ‘spdNMJ vs  
895 extrafusal fiber NMJ’ and ‘spdMTJ vs extrafusal fiber MTJ-B’. Genes enriched in each population  
896 (average logFC > 0.7) were used to generate the diagrams. Statistical analysis was performed using  
897 hypergeometric test using all genes detected in uninjured/regenerating and spindle datasets as  
898 background. **f**, Single molecule FISH experiments of isolated muscle spindle fibers. Arrows  
899 indicate spdNMJ, and asterisks the central non-contractile parts of spindle fibers. All scale bars,  
900 50  $\mu$ m. Expression patterns were validated in 2 or more individuals.

901

902 **Figure 6. Expression profiles of transcription factors and epigenetic regulators across**  
903 **distinct nuclear subtypes.** **a**, Heat-map showing the expression level of transcription factors and  
904 epigenetic regulators in indicated nuclear subtypes; see also Supplementary Table 3 for the full list  
905 including nuclear subtypes not shown in this Figure. **b**, Ebf1 directly binds to genomic regions of  
906 the top 100 genes identified to be specifically expressed in MTJ-B nuclei (ENCODE project -  
907 accession number ENCSR000DZQ), but much less to markers of MTJ-A or NMJ. Classification  
908 of the Ebf1 binding sites in these 100 genes. **c**, Western blot analysis of C2C12 cell line expressing  
909 doxycycline-inducible Ebf1. **d**, Indicated genes were analyzed by RT-qPCR before/after inducing  
910 Ebf1 expression. Dox treatment in control cells (no Ebf1) did not have any effect (data not shown).  
911 Error bars indicate S.E.M. Two tailed paired student’s t-test between untreated and Dox treated  
912 cells (n=3). \*, p < 0.05. \*\*, p < 0.01. \*\*\*, p < 0.001. **e**, Single molecule FISH of indicated marker

913 genes in TA muscle of control or *Ebf1* mutant mice. Arrows indicate myonuclei expressing MTJ-  
914 B marker genes. T, tendon. Downregulation of expression was validated in 4 individuals. Scale  
915 bar, 50  $\mu\text{m}$ .

916

**Fig. 1**

bioRxiv preprint doi: <https://doi.org/10.1101/2020.04.14.041665>; this version posted July 14, 2020. The copyright holder for this preprint (which was not certified by peer review) is the author/funder. All rights reserved. No reuse allowed without permission.

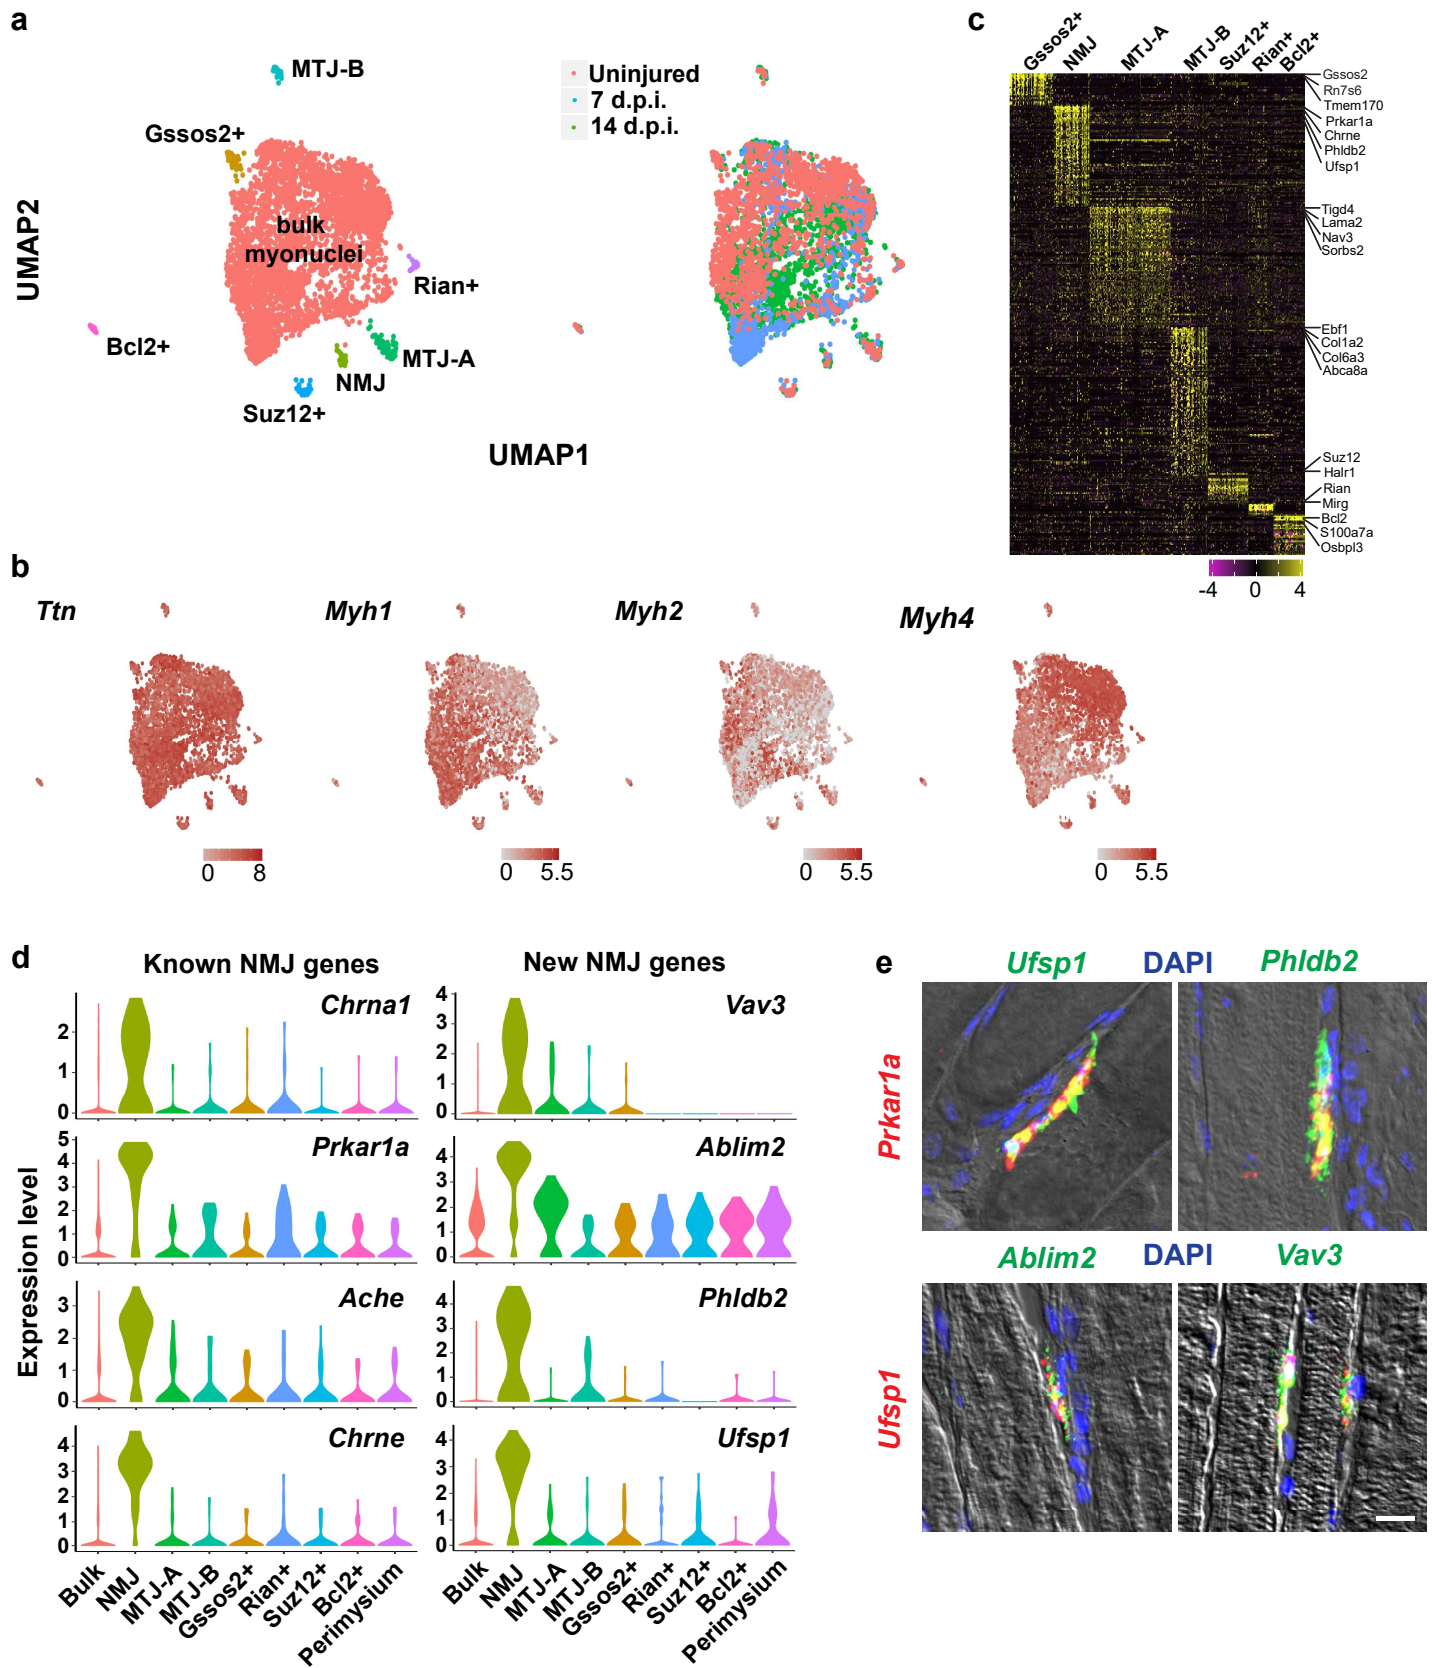

**Fig. 2**

bioRxiv preprint doi: <https://doi.org/10.1101/2020.04.14.041665>; this version posted July 14, 2020. The copyright holder for this preprint (which was not certified by peer review) is the author/funder. All rights reserved. No reuse allowed without permission.

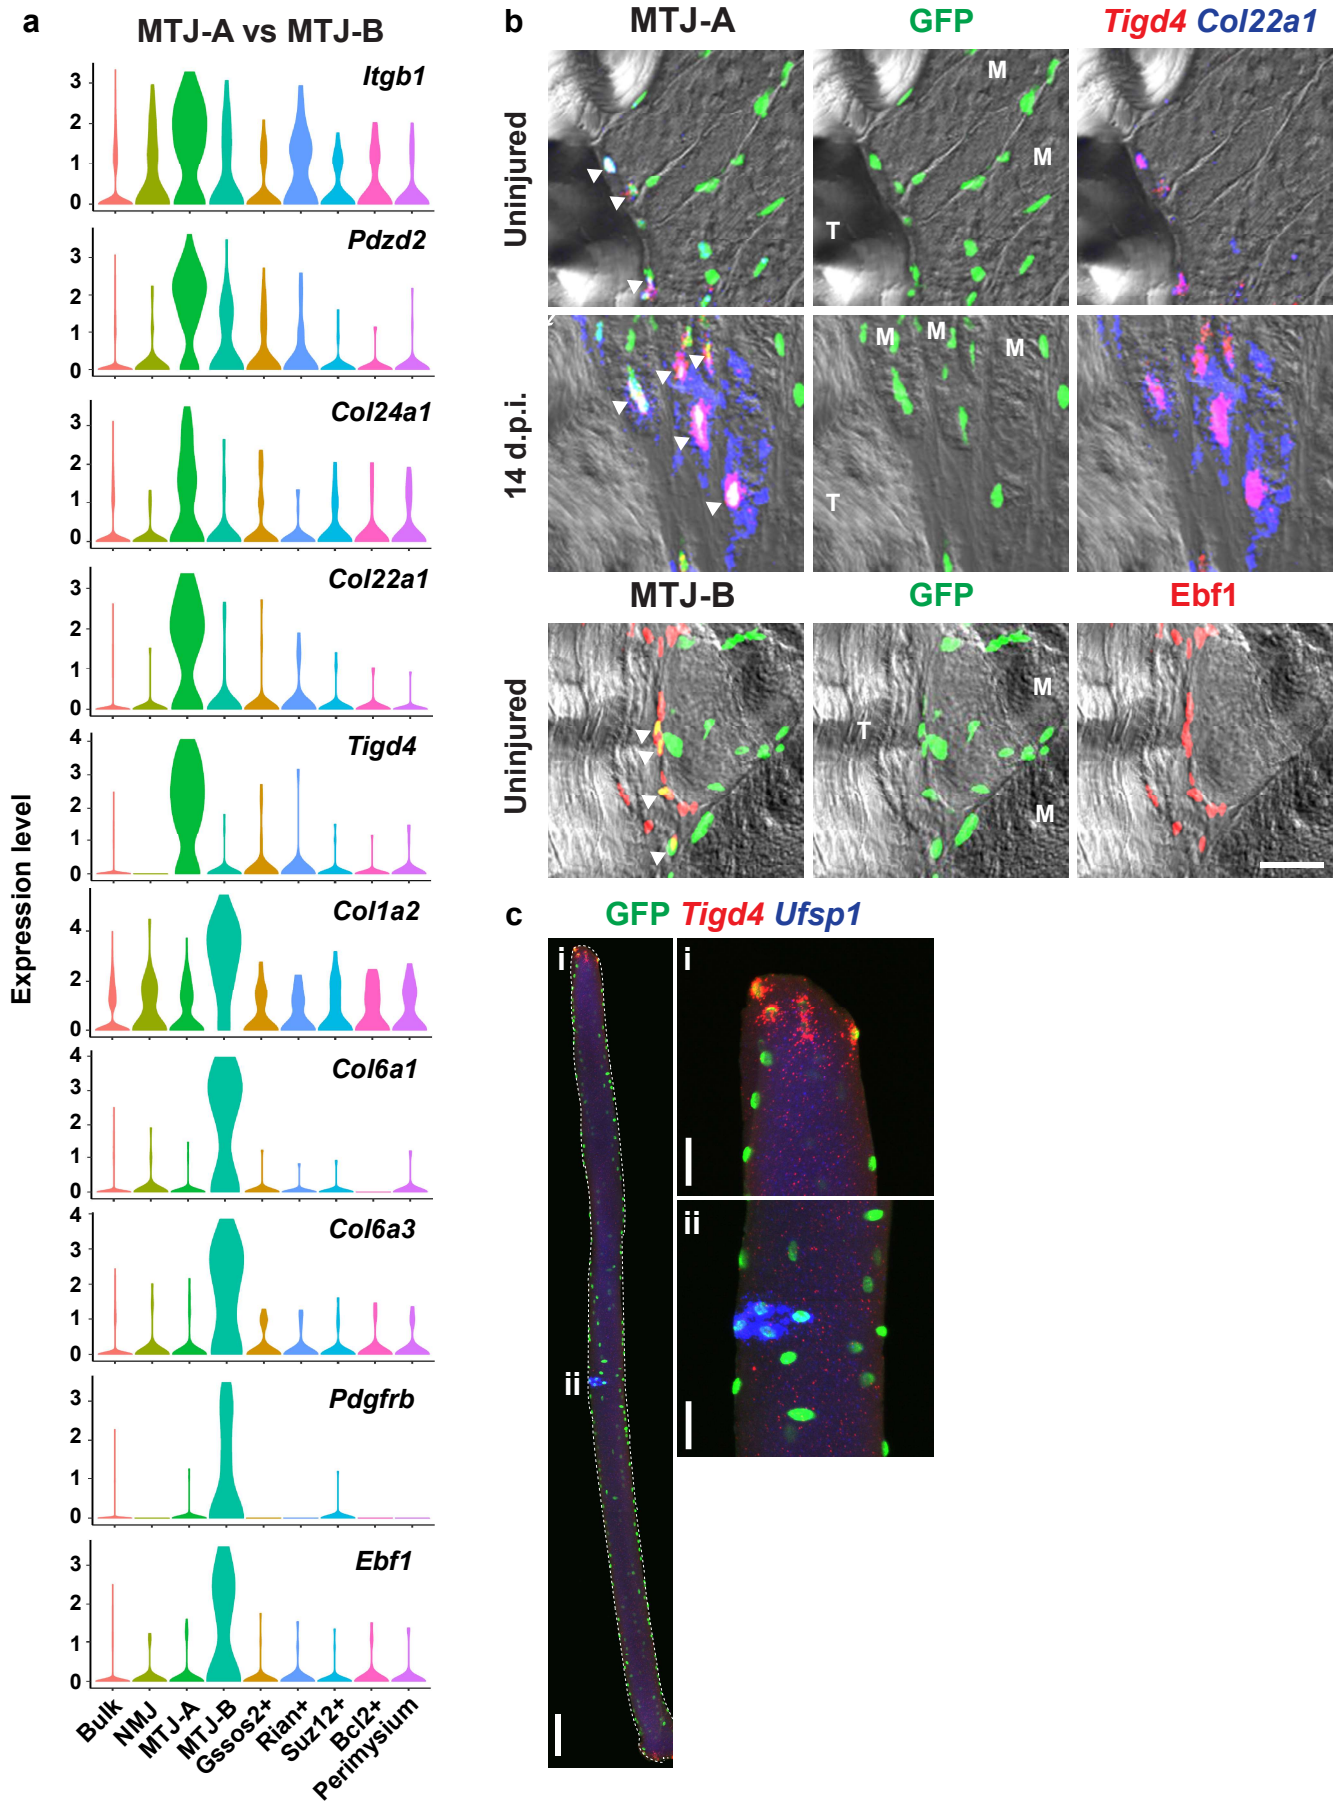



**Fig. 3**

**a Novel nuclear subtypes**

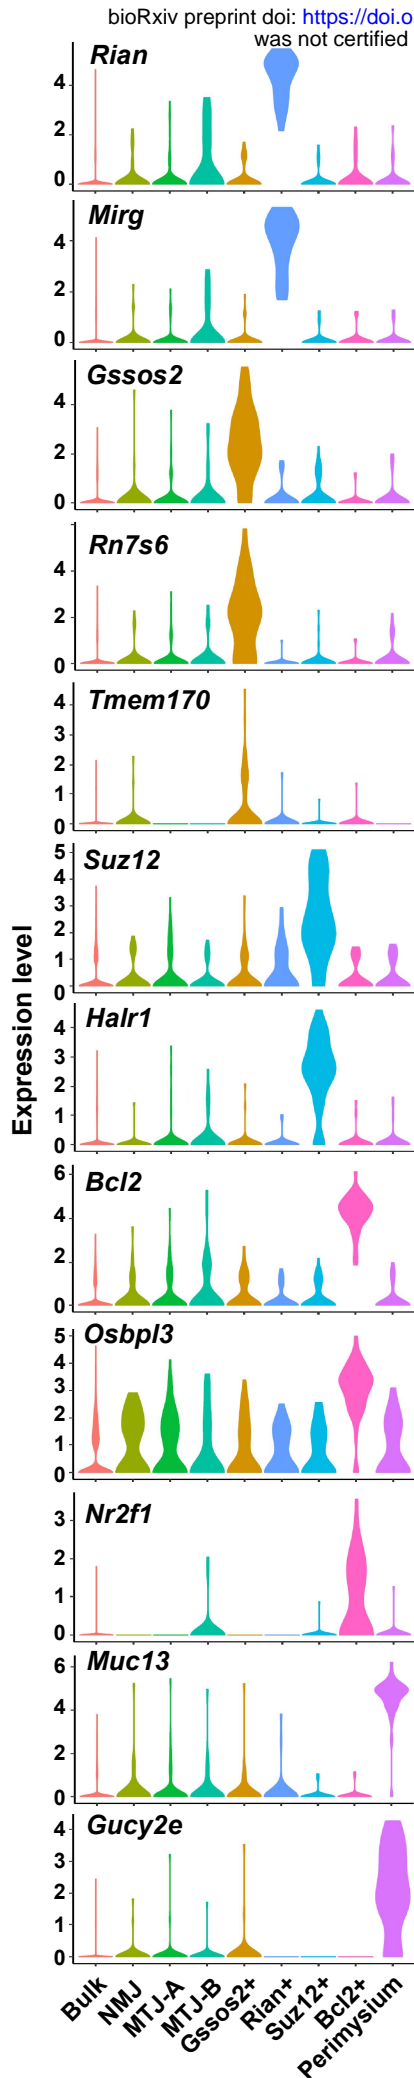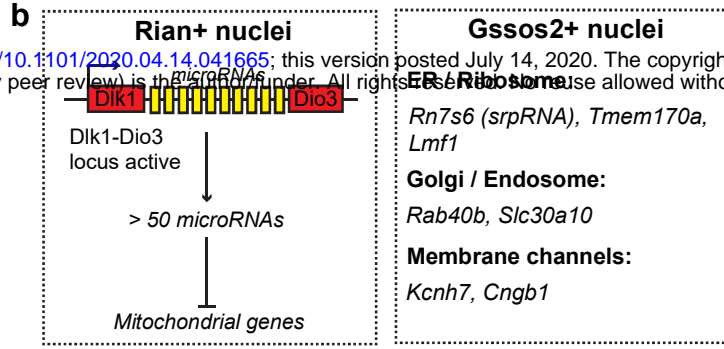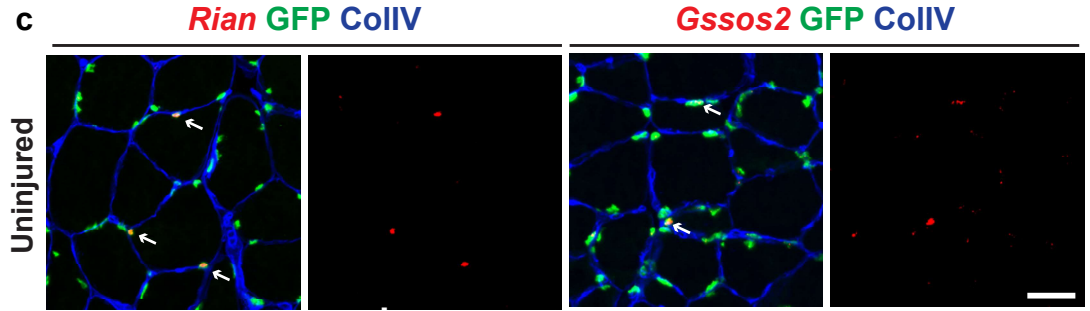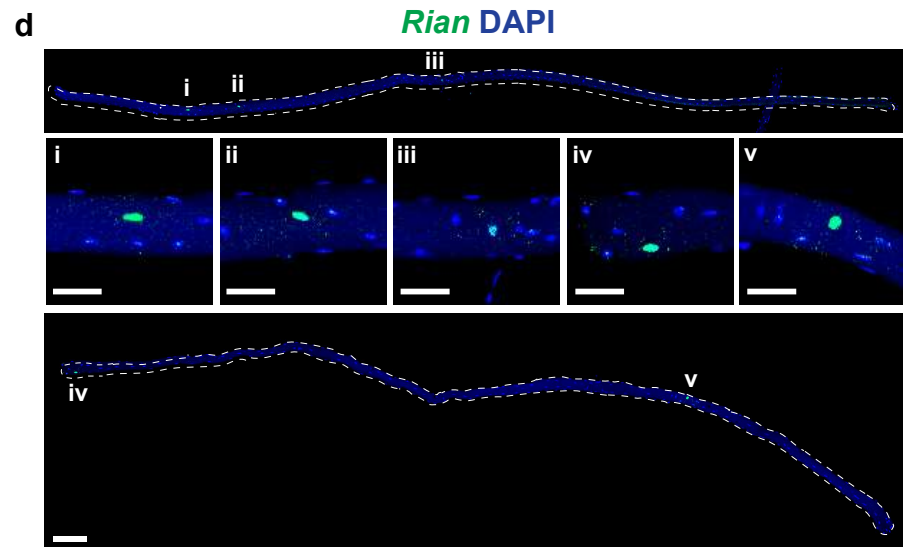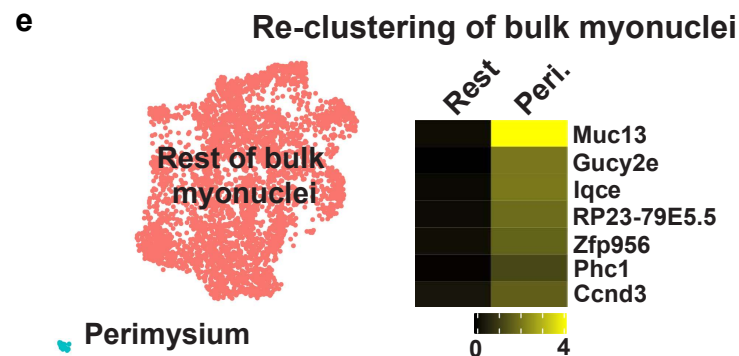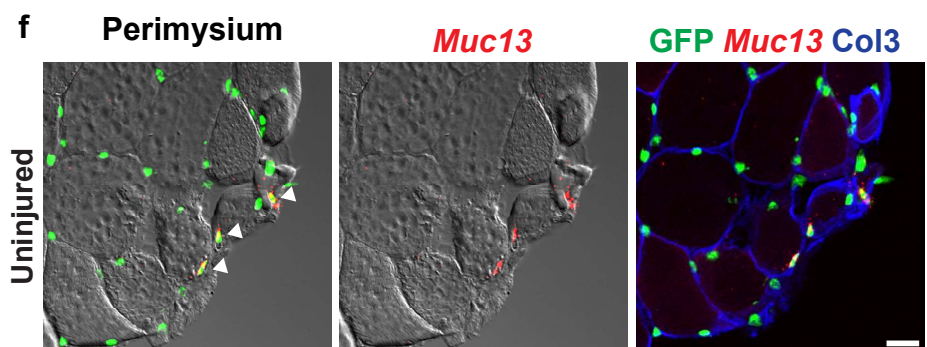

**Fig. 4**

bioRxiv preprint doi: <https://doi.org/10.1101/2020.04.14.041665>; this version posted July 14, 2020. The copyright holder for this preprint (which was not certified by peer review) is the author/funder. All rights reserved. No reuse allowed without permission.

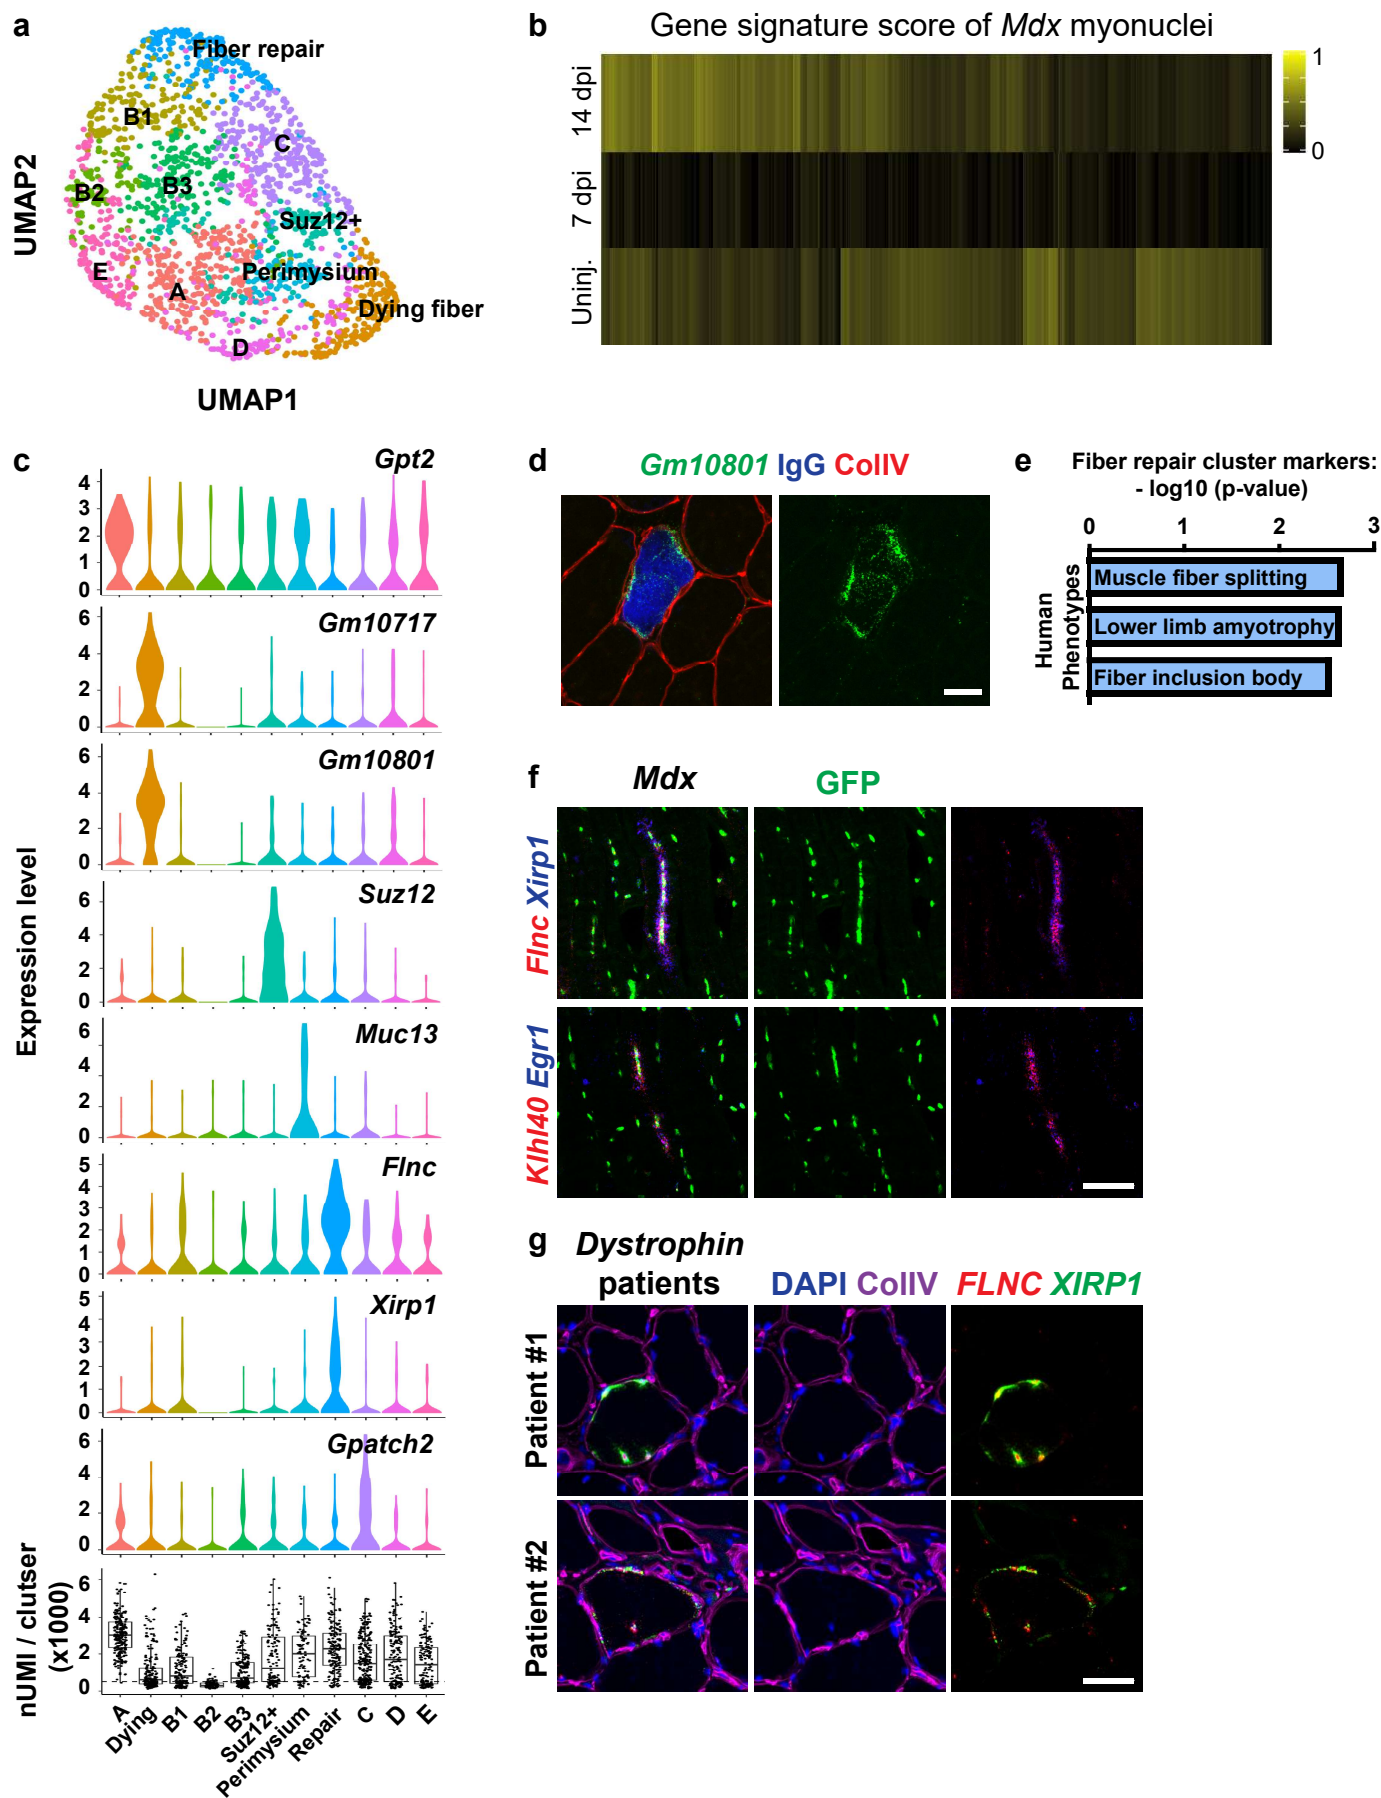

**Fig. 5**

bioRxiv preprint doi: <https://doi.org/10.1101/2020.04.14.041665>; this version posted July 14, 2020. The copyright holder for this preprint (which was not certified by peer review) is the author/funder. All rights reserved. No reuse allowed without permission.

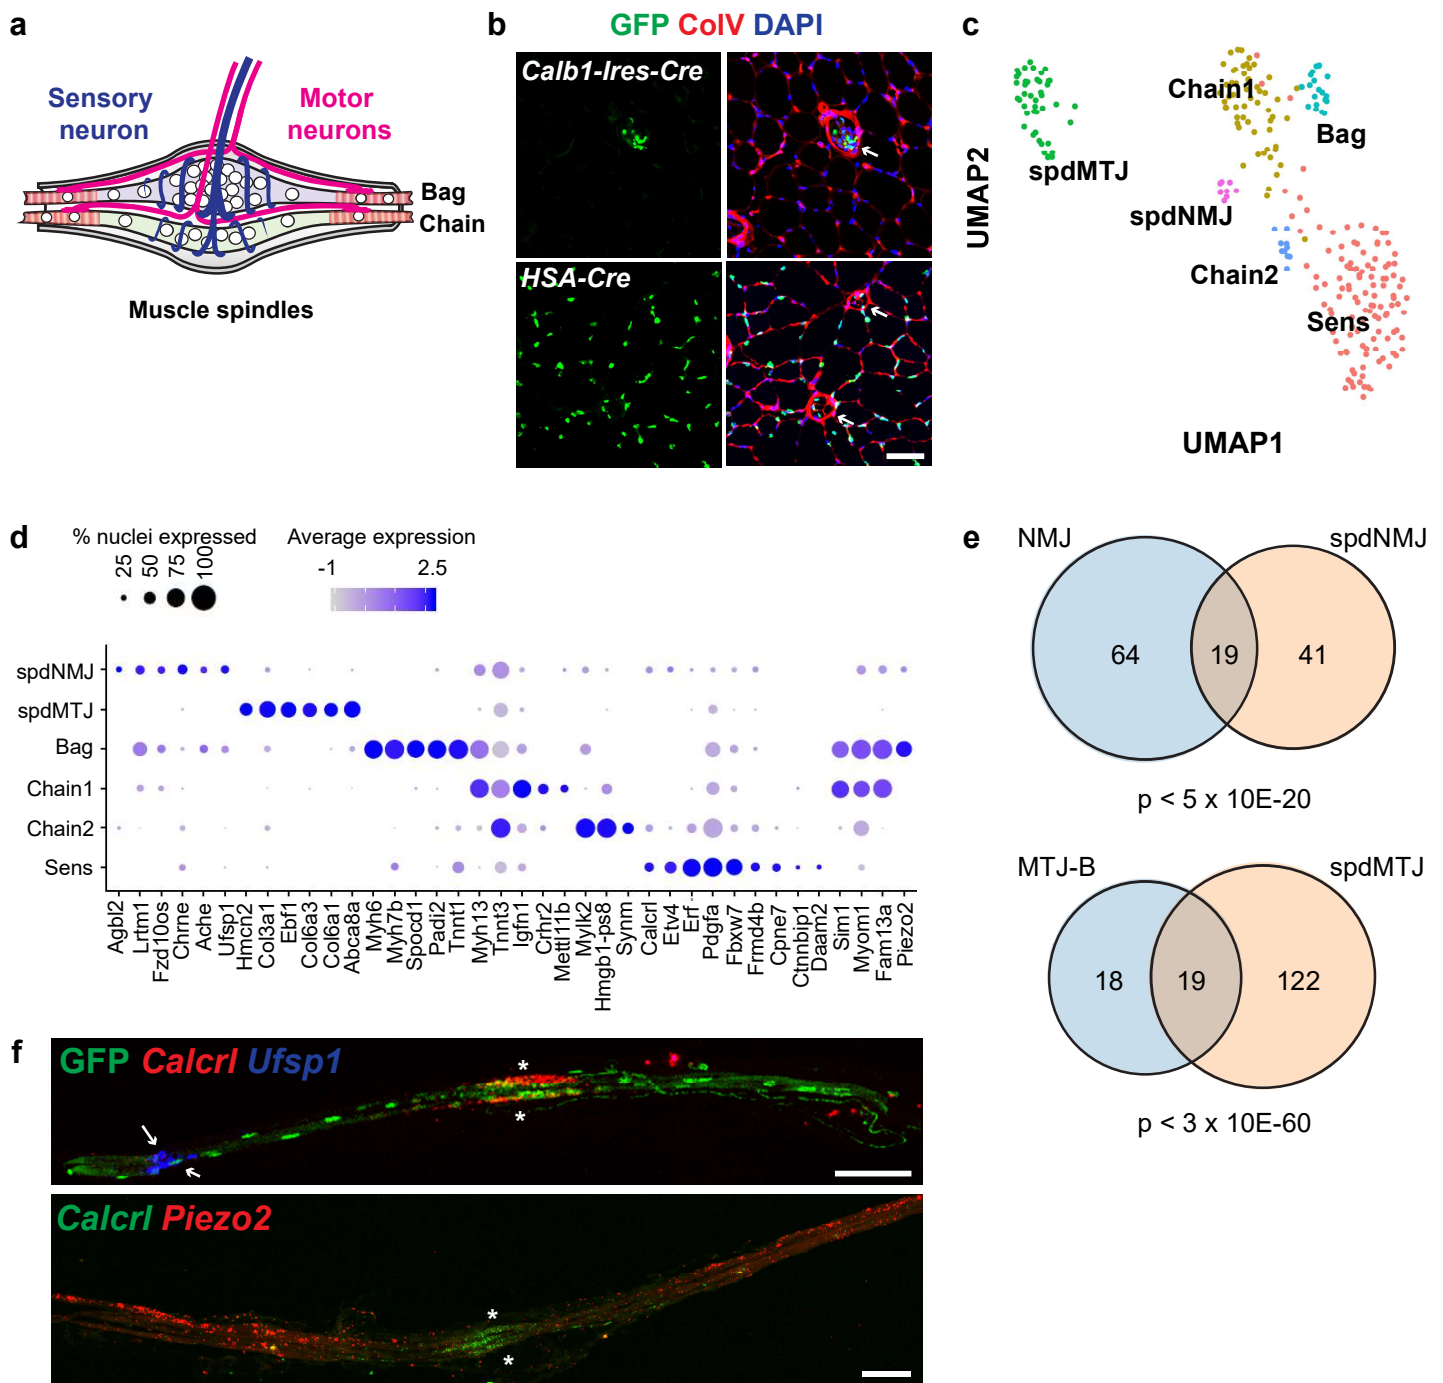



**Fig. 6**

bioRxiv preprint doi: <https://doi.org/10.1101/2020.04.14.041665>; this version posted April 14, 2020. The copyright holder for this preprint (which was not certified by peer review) is the author/funder. All rights reserved. No reuse allowed without permission.

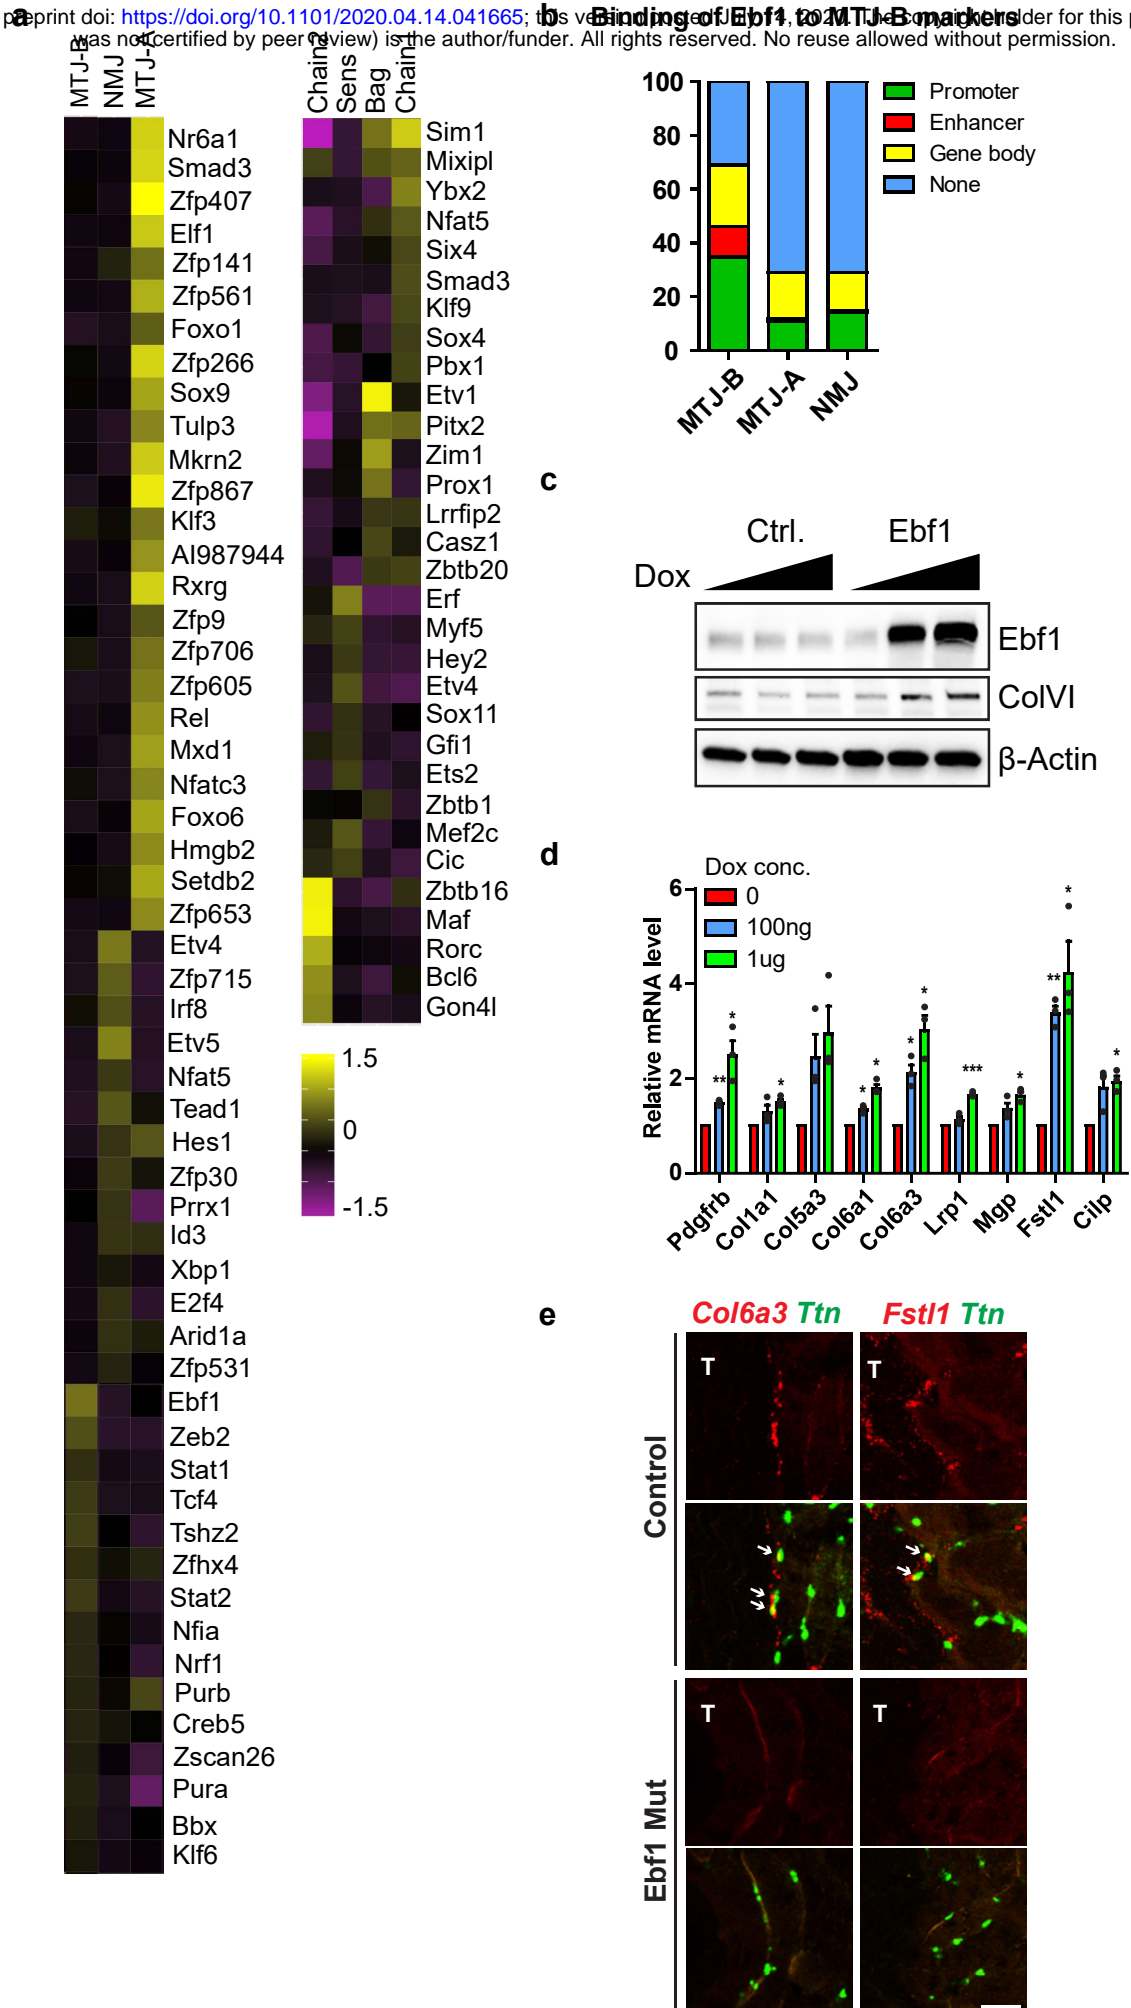

Source: https://www.biorxiv.org/content/10.1101/2020.04.14.041665v2.full.pdf
